# Supplementary material for: Intersectoral approaches and integrated services in achieving the right to health for refugees upon resettlement: a scoping review protocol
Source: PubMed Central journal article supplement — BMJ Open. 2017 Aug 30;7(8):e016638. doi: 10.1136/bmjopen-2017-016638 (PMC5629659; doi:10.1136/bmjopen-2017-016638), 2017-08-30
Supplement: bmjopen-2017-016638.draft_revisions.pdf [file bmjopen-2017-016638.draft_revisions.pdf]

# BMJ Open

BMJ Open is committed to open peer review. As part of this commitment we make the peer review history of every article we publish publicly available.

When an article is published we post the peer reviewers' comments and the authors' responses online. We also post the versions of the paper that were used during peer review. These are the versions that the peer review comments apply to.

The versions of the paper that follow are the versions that were submitted during the peer review process. They are not the versions of record or the final published versions. They should not be cited or distributed as the published version of this manuscript.

BMJ Open is an open access journal and the full, final, typeset and author-corrected version of record of the manuscript is available on our site with no access controls, subscription charges or pay-per-view fees (<http://bmjopen.bmj.com>).

If you have any questions on BMJ Open's open peer review process please email [info.bmjopen@bmj.com](mailto:info.bmjopen@bmj.com)

# BMJ Open

## Intersectoral approaches in achieving the right to health for refugees upon resettlement: A scoping review Protocol

|                                 |                                                                                                                                                                                                         |
|---------------------------------|---------------------------------------------------------------------------------------------------------------------------------------------------------------------------------------------------------|
| Journal:                        | <i>BMJ Open</i>                                                                                                                                                                                         |
| Manuscript ID                   | bmjopen-2017-016638                                                                                                                                                                                     |
| Article Type:                   | Protocol                                                                                                                                                                                                |
| Date Submitted by the Author:   | 16-Mar-2017                                                                                                                                                                                             |
| Complete List of Authors:       | Javadi, Dena; World Health Organization<br>Langlois, Etienne V.; WHO<br>Ho, Shirley; Johns Hopkins University<br>Friberg, Peter; Medicine, Clinical Physiology<br>Tomson, Göran ; Karolinska Institutet |
| <b>Primary Subject Heading</b>: | Health services research                                                                                                                                                                                |
| Secondary Subject Heading:      | Ethics, Global health, Health policy, Public health, Qualitative research                                                                                                                               |
| Keywords:                       | intersectoral, refugees, human rights, integration, resettlement                                                                                                                                        |
|                                 |                                                                                                                                                                                                         |

SCHOLARONE™  
Manuscripts

Peer Review Only

1  
2  
3 1 **Intersectoral approaches in achieving the right to health for refugees upon resettlement:**

4  
5  
6 2 **A scoping review Protocol**

7  
8 3  
9  
10 4 Dena Javadi \*<sup>1</sup> email: javadid@who.int

11  
12 5 Etienne V. Langlois<sup>1</sup> email: langloise@who.int

13  
14 6 Shirley Ho<sup>1</sup> email: Shirley.ho@jhu.edu

15  
16 7 Peter Friberg<sup>2,4</sup> email: peter.friberg@mednet.gu.se

17  
18 8 Goran Tomson<sup>2,3</sup> email: Goran.Tomson@ki.se

19  
20 9  
21  
22  
23  
24 10 <sup>1</sup> Alliance for Health Policy and Systems Research, World Health Organization, Avenue Appia  
25  
26 11 20, 1211 Geneva, Switzerland.

27  
28  
29 12 <sup>2</sup> Swedish Institute for Global Health Transformation, SIGHT, Royal Swedish Academy of  
30  
31 13 Sciences, Stockholm, Sweden

32  
33  
34 14 <sup>3</sup> Health System and Policy, Global Health, Karolinska Institutet, Stockholm, Sweden

35  
36 15 <sup>4</sup> Molecular and clinical medicine, Sahlgrens Academy and university hospital, Gothenburg  
37  
38 16 university, Gothenburg, Sweden

39  
40  
41  
42  
43 18 **\*Corresponding Author:**

44  
45 19 Dena Javadi, javadid@who.int

46  
47  
48 20 Technical Officer, Alliance for Health Policy and Systems Research

49  
50  
51  
52 22 **Word count:**

53  
54  
55 23 **Keywords:** intersectoral, human rights, access, refugees, integration, resettlement  
56  
57  
58  
59  
60

1  
2  
3  
4  
5  
6  
7  
8  
9  
10  
11  
12  
13  
14  
15  
16  
17  
18  
19  
20  
21  
22  
23  
24  
25  
26  
27  
28  
29  
30  
31  
32  
33  
34  
35  
36  
37  
38  
39  
40  
41  
42  
43  
44  
45  
46  
47  
48  
49  
50  
51  
52  
53  
54  
55  
56  
57  
58  
59  
60

## 24 ABSTRACT

25 **Introduction:** Global insecurity and climate change are exacerbating the need for improved  
26 management of refugee resettlement services. International standards hold states responsible for  
27 the protection of the right of non-citizens to an adequate standard of physical and mental health,  
28 while recognizing the importance of social determinants of health. However, programmes to  
29 protect refugees' right to health often lack coordination and monitoring. This paper describes the  
30 protocol for a scoping review to assess barriers and facilitators to provision of health services for  
31 refugees; the content, process and actors involved in protecting refugee health; and the extent to  
32 which intersectoral approaches and integration of services are leveraged to protect refugees' right  
33 to health upon resettlement, especially for vulnerable groups such as women and children.

34 **Methods and analysis:** Peer reviewed and grey literature will be searched to identify  
35 programmes and interventions designed to promote refugee health in receiving countries. Two  
36 reviewers will screen articles and abstract data. Two frameworks for integration and  
37 intersectoral action will be applied to understand how and why certain approaches work while  
38 others do not and to identify the actors involved in achieving success at different levels of  
39 integration as defined by these frameworks.

40 **Dissemination:** Findings from the scoping review will be shared in relevant conferences and  
41 meetings. A brief will be created with lessons learned from successful programmes to inform  
42 decision making in design of refugee programmes and services.

43 **Registration:** Registered on Open Science Framework at <https://osf.io/gt9ck/>

44

45

## 46 STUDY SUMMARY

- 47 • Programmes to protect refugees' right to health often lack coordination and monitoring.
- 48 • This paper describes the protocol for a scoping review to assess barriers and facilitators to  
49 provision of health services for refugees.
- 50 • Peer reviewed and grey literature will be searched to identify programmes and  
51 interventions designed to promote refugee health in receiving countries.

### 52 **Strengths and Limitations:**

- 53 • Many fragmented programmes exist to attempt to address the unique challenges faced by  
54 refugees but these are largely unevaluated and lack sustainability. This scoping review  
55 will help to communicate lessons learned relating to barriers, facilitators, strategies and  
56 intersectoral approaches that are needed to aide in the design of future policies and  
57 programmes for integration of refugee health care and protect their right to health.
- 58 • This study will be limited by the quality of the literature on health care programs for  
59 refugees and protection to their right to health.

## 61 INTRODUCTION

62 The Office of the United Nations High Commission for Human Rights (OHCHR) identifies the  
63 right to the enjoyment of the highest attainable standard of physical and mental health as a  
64 fundamental part of human rights, first articulated in the 1946 Constitution of the World Health  
65 Organization (WHO).<sup>1</sup> While the right to health includes access to health care and the hard  
66 infrastructure associated with that – such as hospitals and ambulances – it also includes the  
67 underlying determinants of health including, safe drinking water, adequate sanitation, safe food,  
68 adequate nutrition and housing, healthy working and environmental conditions, health related  
69 education and information, and gender equality.<sup>1</sup> Freedoms which protect individuals from non-  
70 consensual medical treatment, torture and other degrading treatment are also included in this  
71 definition. Furthermore, entitlements under the right to health include universal health coverage  
72 – now a target under Sustainable Development Goal 3 – broadly covering access to preventative  
73 and curative services, essential medicines, timely basic health services, health related education,

1  
2  
3 74 and participation in health related decision making at both national and community levels.<sup>1,2</sup>  
4  
5 75 Especially relevant to the plight of refugees, the right to health includes non-discrimination  
6  
7  
8 76 whereby health services, goods and facilities must be provided to all without any discrimination.  
9  
10  
11 77 Lastly, these health services must be available in sufficient quantity, accessible, medically and  
12  
13 78 culturally acceptable, and of good quality, which includes having a trained health workforce, safe  
14  
15 79 products and adequate sanitation.<sup>2</sup>  
16

17  
18 80 The influx of refugees over the last few years makes the realization of these rights a legal and  
19  
20 81 logistical challenge.<sup>3,4</sup> Different in definition from the term “migrant,” “refugees” are those  
21  
22 82 fleeing armed conflict or persecution as defined by the 1951 Refugee Convention which also  
23  
24 83 identifies their basic rights, specifically that refugees should not be returned to situations that are  
25  
26  
27 84 deemed a threat to their life or freedom.<sup>5</sup> A key distinction is that refugee rights are not only a  
28  
29 85 matter of national legislation, but also of international law.<sup>6</sup> Despite these legal protections,  
30  
31 86 refugees face many challenges in accessing health services, especially more vulnerable groups  
32  
33  
34 87 like women and children.<sup>3,4</sup> Many states explicitly exclude refugees from the level of protection  
35  
36 88 afforded to their citizens, instead choosing to offer “essential care” or “emergency health care,”  
37  
38  
39 89 which is differentially defined across countries.<sup>7</sup> The Committee on the Elimination of Racial  
40  
41 90 Discrimination, and the Committee on Economic, Social and Cultural Rights, both include  
42  
43 91 general comments that hold States accountable to “the right of non-citizens to an adequate  
44  
45  
46 92 standard of physical and mental health by, inter alia, refraining from denying or limiting their  
47  
48 93 access to preventive, curative and palliative health services.”<sup>8</sup>  
49

50  
51 94 However, the capacity of States to truly protect these rights is limited.<sup>9</sup> As the boundaries of the  
52  
53 95 right to health have expanded due to increased understanding of social determinants of health  
54  
55 96 and the health impacts of the lived environment, legal frameworks have been insufficient in  
56  
57  
58  
59  
60

1  
2  
3 97 ensuring the protection of these rights.<sup>10,11</sup> Refugees are not only more likely to have poorer  
4  
5 98 health during resettlement, but they also face challenges in navigating legal, education, health,  
6  
7  
8 99 housing and employment services, which further threatens their quality of life and health status.<sup>12</sup>  
9  
10 100 A lack of coordination and integration across these services undermines their effectiveness.<sup>13</sup>  
11  
12 101 Much like the shift from the more vertical approaches of the millennium development goals  
13  
14 102 (MDGs) towards the more integrated sustainable development goals (SDGs), the protection of  
15  
16 103 the right to health too calls for an intersectoral approach whereby health is applied to all policies  
17  
18 104 for all people.<sup>14</sup> Therefore, for states to effectively protect the right to health for refugees there is  
19  
20 105 a need to work across sectors and disciplines to better integrate targeted programmes and  
21  
22 106 initiatives, thereby improving standards of care during resettlement. Some evidence exists that  
23  
24 107 supporting collaboration and coordination across social services improves the quality of care  
25  
26 108 received and its effectiveness.<sup>12</sup> Furthermore, the refugee sub-population is diverse and requires  
27  
28 109 extraneous considerations in ensuring the right to health, not only as compared to the general  
29  
30 110 population, but also within the sub-population itself. Many fragmented psychosocial programmes  
31  
32 111 exist to attempt to address the unique challenges faced by refugees but these are largely  
33  
34 112 unevaluated and lack sustainability.<sup>15,16</sup> Better understanding, documentation, and reporting of  
35  
36 113 the dynamic nature of such interventions and their means of health system integration and  
37  
38 114 intersectoral collaboration, are necessary to ensure that lessons learned are communicated and  
39  
40 115 implemented in the design of future policies and programmes. Therefore, we aim to conduct a  
41  
42 116 scoping review to assess barriers and facilitators to health promotion services for refugees; the  
43  
44 117 content, process and actors involved in protecting refugee health; and the extent to which  
45  
46 118 intersectoral approaches and integration of services are leveraged to protect refugees' right to  
47  
48  
49  
50  
51  
52  
53  
54  
55  
56  
57  
58  
59  
60

1  
2  
3 119 health upon resettlement. This paper will outline the protocol for this review. The specific  
4  
5  
6 120 research questions for the review will be as follows:

- 7  
8 121 (1) What are the barriers and facilitators (context) in integrating targeted services for  
9  
10 122 refugees across sectors?  
11  
12 123 (2) What strategies (content, process, and actors) are involved in addressing refugees' right  
13  
14 124 to health upon resettlement?  
15  
16 125 (3) To what extent are intersectoral approaches used to protect refugees' right to health,  
17  
18 126 particularly in women and children?  
19  
20  
21  
22 127  
23  
24  
25 128

## 26 27 129 **METHODS**

### 28 29 130 **Study Design**

30  
31 131 This study will be conducted using the scoping review methodology as described by the Joanna  
32  
33 132 Briggs Institute Methods Manual for scoping reviews.<sup>17,18</sup> Scoping reviews are used to map key  
34  
35 133 concepts in an area to identify the scope of practice, working definitions, conceptual boundaries,  
36  
37 134 and the types of evidence available. We opted for a scoping review due to the complex nature of  
38  
39 135 this topic, the changing global landscape around it, and the insufficient evidence base to support  
40  
41 136 effective decision making.<sup>18</sup>

42  
43 137 The five stages outlined in a methodological framework for scoping studies are as follows: i)  
44  
45 138 identify the research question, ii) identify relevant studies, iii) study selection, iv) charting the  
46  
47 139 data, and v) collating, summarising and reporting results.<sup>18</sup>

### 48 49 140 **Protocol**

50  
51  
52  
53  
54  
55  
56  
57  
58  
59  
60



1  
2  
3 141 The Preferred Reporting Items for Systematic Reviews and Meta-analysis for Protocols  
4  
5 142 (PRISMA-P) checklist in drafting this protocol.<sup>19</sup> It has been reviewed by the research team  
6  
7  
8 143 members.

#### 10 144 **Frameworks to address research questions**

12 145 While some evidence suggests that improved collaboration and coordination across social sectors  
13  
14 146 can contribute to enhancing refugee health, there remains a need for a stronger evidence base on  
15  
16  
17 147 the context, processes and actors involved in protecting refugees' right to health upon  
18  
19  
20 148 resettlement.<sup>12</sup> Therefore, the research questions identified for this scoping review focus on  
21  
22 149 integration and use of intersectoral approaches to address the complex needs of this vulnerable  
23  
24  
25 150 population. Two frameworks are being used concurrently in order to comprehensively identify  
26  
27 151 barriers, facilitators, processes, and actors involved at various stages in programme planning and  
28  
29 152 implementation. The first is a framework for analyzing integration of targeted health  
30  
31 153 interventions in systems, where integration is defined as "the extent, pattern, and rate of adoption  
32  
33  
34 154 and eventual assimilation of health interventions into each of the critical functions of a health  
35  
36 155 system."<sup>20</sup> Elements in this framework include (i) governance, (ii) financing, (iii) planning, (iv)  
37  
38 156 service delivery, (v) monitoring and evaluation (M&E), and (vi) demand generation.<sup>20</sup> To be  
39  
40 157 considered integrated, a health system intervention needs to fulfill certain requirements across  
41  
42  
43 158 these six areas as defined by the framework.<sup>20</sup> We define an intervention here as *changes in*  
44  
45  
46 159 *service delivery, organizational models, process modification, or new technologies*. To satisfy  
47  
48 160 governance needs for integration, governance and regulatory mechanisms for the intervention  
49  
50 161 match those of the general health system.<sup>20</sup> For financing, full integration has occurred when  
51  
52  
53 162 funding is incurred from national or regional budgets.<sup>20</sup> In planning – which constitutes needs  
54  
55 163 assessment, priority setting and resource allocation – full integration occurs when the same

1  
2  
3 164 institutions and stakeholders are involved as those planning general health/ other social  
4  
5 165 systems.<sup>20</sup> If service delivery is the responsibility of general staff embedded in the system, the  
6  
7  
8 166 intervention is considered integrated.<sup>20</sup> Similarly, if monitoring and evaluation was conducted by  
9  
10  
11 167 those with overall M&E responsibility, then the intervention is considered integrated.<sup>20</sup> Finally,  
12  
13 168 demand generation is seen as integrated where services were promoted and incentivized by  
14  
15 169 general staff within the existing system.<sup>20</sup>  
16

17  
18 170 The second framework applied is that of the Health in All Policies (HiAP) framework for  
19  
20 171 country action. HiAP is defined as a way for countries to protect population health through “an  
21  
22 172 approach to public policies across sectors that systematically takes into account the health  
23  
24 173 implications of decisions, seeks synergies, and avoids harmful health impacts in order to improve  
25  
26  
27 174 population health and health equity.”<sup>21</sup> HiAP can be a powerful tool for enhancing accountability  
28  
29 175 and safeguarding against distortions imposed by deleterious commercial and political interests.  
30  
31 176 HiAP is in line with the human rights principles of legitimacy, protected by national and  
32  
33  
34 177 international law, accountability of governments to people, transparency of decision making,  
35  
36 178 participation of the wider society, sustainability of policies to meet current needs without  
37  
38  
39 179 compromising future ones, and collaboration across sectors and levels of government.<sup>11,21</sup> The  
40  
41 180 HiAP framework for action involves six components including: i) establish the need and  
42  
43  
44 181 priorities for HiAP, ii) frame planned action, iii) identify supportive structures and policies, iv)  
45  
46 182 facilitate assessment and engagement, v) ensure monitoring and evaluation, and vi) build  
47  
48 183 capacity.<sup>21</sup> These six components, adapted to refugee needs, will be used in the scoping review to  
49  
50  
51 184 frame barriers and facilitators in integrating refugee services across sectors through intersectoral  
52  
53 185 collaboration. The framework for integration will then be used to assess the extent to which  
54  
55  
56  
57  
58  
59  
60

1  
2  
3 186 provisions for protecting refugees' right to health are integrated into existing social systems, and  
4  
5 187 the content, process, and actors involved in integration.<sup>22</sup>  
6  
7

### 8 188 **Identifying relevant studies**

9  
10 189 **Population:** Eligible studies and papers will include those targeting refugees as previously  
11  
12 190 defined. We are not including other categories of migrants as their legal entitlements are  
13  
14 191 different to those of refugees which are protected under international law.  
15  
16

17 192 **Intervention:** Eligible studies and papers will describe a programme, approach or technical  
18  
19 193 innovation that aims to protect refugees' right to health, including interventions aimed at  
20  
21 194 addressing the social determinants of health. Interventions outside of the health sector that affect  
22  
23 195 health will be included. If the studies do not display some level of integration nor  
24  
25 196 intersectorality, based on the combined frameworks for integration and HiAP, they will not be  
26  
27 197 assessed further.<sup>20,21</sup>  
28  
29  
30

31 198 **Comparators:** Eligible studies and papers do not necessarily have to display a comparator as this  
32  
33 199 scoping review is meant to gauge the state of the evidence. Where comparators exist, any types  
34  
35 200 are relevant for inclusion, for example those comparing a parallel approach to service provision  
36  
37 201 for refugees versus an integrated approach.  
38  
39

40 202 **Outcomes:** Eligible studies and papers will include those discussing plans for action, strategies,  
41  
42 203 barriers, facilitators or outcomes in integrating refugee health using an intersectoral approach.  
43  
44 204 Studies or commentaries that solely discuss theories and conceptual models will be excluded.  
45  
46  
47

48 205 **Study design:** Qualitative, quantitative, and mixed methods will be eligible for inclusion.  
49  
50 206 Experimental designing including randomized controlled trials, non-randomized controlled trials  
51  
52 207 and quasi-experimental models will be included, as well as observation and qualitative studies  
53  
54 208 including cohort, cross sectional, case series, ethnographic, interview/based, and focus-group  
55  
56  
57  
58  
59  
60

1  
2  
3 209 discussion based studies. Grey literature that explores plans, strategies, barriers, facilitators or  
4  
5  
6 210 outcomes of refugee health. Implementation research and operations research studies will also be  
7  
8 211 included. Studies or report outlining stakeholder experiences and plans will also be included as  
9  
10 212 case studies.

11  
12 213 **Time period:** In order to ensure relevance, only studies from 2000 onward have been included,  
13  
14 214 making the study period range over 16 years.

15  
16 215 **Setting:** Eligible studies will be set in countries receiving refugees and asylum seekers (who may  
17  
18 216 eventually qualify for refugee status) and serving as hosts for resettlement.

### 217 **Information sources and search strategy**

218 Based on the study team's concepts for the review, an experienced team of librarians from  
219 Karolinska Institutet will conduct a search of articles from 2000 onward in the following  
220 electronic databases: MEDLINE, Web of Science, Global Health, and PsycInfo Embase. The  
221 three concepts used to create the search strategy will include: i) refugees; ii) type of service  
222 provision (health sector service delivery, intersectoral, partnerships, etc.); and iii) health equity,  
223 human rights and social determinants of health. See appendix I for search strategy.

224 The search of the peer-reviewed literature will be supplemented by a search of grey literature  
225 through government websites, particularly governments of countries that receive the highest  
226 refugee burden, reports from multi-nationals and non-governmental organizations, conference  
227 abstracts, dissertations, and news articles. Any additional report and articles will be identified by  
228 reaching out to relevant stakeholders in the authors' professional networks, including those  
229 involved in the European refugee response.

### 230 **Study selection process**

231 Search results will be cleaned for duplicates and uploaded to an excel document, which will be  
232 used for screening using the eligibility criteria described above.

233 Two members of the study team will screen results based on the screening tool discussed. Inter-  
234 rater reliability will be assessed based on a set of 100 initial screens, and adjustments and  
235 clarifications to the screening tool will be made if reliability is not as high as desired (above  
236 80%). Once a set of included studies and papers are identified, two reviewers will continue on to  
237 a full-text screen in order to further refine the results using the aforementioned frameworks for  
238 integration and intersectorality (HiAP). Eligible studies will be those displaying some attempt at  
239 integration or intersectorality (which will be defined as satisfying at least 2 of the 6 elements in  
240 either one of the integration or HiAP frameworks). A third reviewer has been identified in the  
241 event of disagreement between the two reviewers. This will be followed by data abstraction from  
242 the finalized set.

243

#### 244 **Data abstraction and charting process**

245 General data collected will include study design, setting, and journal discipline. Demographic  
246 data collected will include target study group (gender, age, ethnic background), number of  
247 participants, economy status of setting based on World Bank classifications, and level of the  
248 health system where applicable. Intervention-specific data collected will include the type of  
249 intervention, the social determinant of health being addressed, the primary sector(s) involved,  
250 duration, resources, funding source, and conceptual framework applied if any. Outcome data  
251 collected will include barriers, facilitators, strategies, plans, qualitative findings from interviews  
252 and focus groups, and any unintended consequences. In the final set of included studies – those  
253 displaying some level of integration or intersectorality – key elements will be charted according  
254 to the two frameworks described above.<sup>18,20,21</sup> Data will be charted to include types of

1  
2  
3 255 stakeholders involved in (i) governance, (ii) financing, (iii) planning, (iv) service delivery, (v)  
4  
5 256 monitoring and evaluation (M&E), and (vi) demand generation.<sup>20</sup> This will assess the extent of  
6  
7  
8 257 integration while data charted against the six components of the HiAP framework will assess the  
9  
10  
11 258 intersectoral potential of the intervention.

12  
13 259 The data abstraction form will be tested by both reviewers using 5 studies. Where there is a  
14  
15 260 sufficient level of agreement across reviewers (above 80%), data abstraction will continue as  
16  
17 261 designed. If agreement falls below the required range, the data abstraction form will be clarified.

### 20 262 **Risk of bias assessment**

21  
22 263 In line with the manual used to design this scoping review, risk of bias assessments will not be  
23  
24 264 conducted.<sup>17</sup>

### 29 266 **Results**

30  
31 267 Frequency tables will be used to describe included studies quantitatively while narratives will be  
32  
33 268 used to describe interventions, barriers, facilitators, and other qualitative outcomes. Stakeholders  
34  
35 269 will be presented based on the combined integration and HiAP frameworks, with their roles and  
36  
37 270 involvement in the studies outlined. If a sufficiently diverse range of studies are identified,  
38  
39 271 stratification by health system level and country economy status will be done. As this is a  
40  
41 272 scoping review, meta-analysis will not be conducted.

42  
43 273 Charted data will be mapped out into subcategories to allow for a narrative description of  
44  
45 274 barriers and facilitators, including barriers specific to vulnerable groups (women, children,  
46  
47 275 torture survivors, those with disabilities, etc.). Two members of the study team will code studies  
48  
49 276 on NVivo software<sup>23</sup> using a coding guide based on the two frameworks used for the review.  
50  
51  
52  
53 277 New themes will be added where necessary and elements of integration and/or intersectorality  
54  
55  
56  
57  
58  
59  
60

1  
2  
3 278 that are more or less prevalent across included studies will be highlighted. Finally, context,  
4  
5 279 content, process and actors will be mapped based on charted data in accordance with the Walt  
6  
7  
8 280 Policy Triangle.<sup>22</sup> Vulnerabilities of specific groups such as women and children will be  
9  
10 281 highlighted  
11

## 12 282

### 15 283 **DISCUSSION**

#### 17 284 **Implications**

19  
20 285 This scoping review will identify programmes, approaches and interventions both within and  
21  
22 286 outside the health sector that promote and protect refugees' right to health directly or indirectly  
23  
24 287 through social determinants of health. To support country-level decision making and resettlement  
25  
26 288 efforts, this review will provide a snapshot of the extent of integration and intersectoral  
27  
28 289 collaboration currently reported in this area, barriers and facilitators to provision of such services  
29  
30 290 and their integration, and key stakeholders involved as well as those often missing. Findings will  
31  
32 291 be shared with WHO colleagues working in this area, the Alliance for Health Policy and Systems  
33  
34 292 Research contacts, and a network of policy makers who will in turn share with their national and  
35  
36 293 local networks. Other expected outputs include an improved understanding of contextual factors  
37  
38 294 that are necessary in supporting the right to health for refugees as well as a narrative exploration  
39  
40 295 of whether intersectoral collaboration and the idea of "Health in All Policies" (HiAP) also works  
41  
42 296 to protect and promote the health of persons outside of the traditional definitions of citizenry.  
43  
44 297 These discussions will stimulate dialogue on how receiving countries can strengthen the  
45  
46 298 resilience of their social systems to enhance their capacity for effective resettlement and  
47  
48 299 improved health outcomes in their refugee populations.  
49  
50  
51  
52

#### 53 300 **Dissemination**

54  
55  
56  
57  
58  
59  
60

1  
2  
3 301 In addition to the study team's respective networks, this review will also be disseminated at  
4  
5 302 relevant conferences, meetings, and communities of practice focused on enhancing use of  
6  
7  
8 303 evidence in policy making. A brief of key learnings will be created to support evidence-informed  
9  
10 304 decision making in this area.

### 11 12 305 **ETHICS APPROVAL**

13  
14  
15 306 Ethics approval is not required for this scoping review as human subjects are not involved.  
16  
17

### 18 19 307 **AUTHOR'S CONTRIBUTIONS**

20  
21 308 DJ drafted the paper and will be acting as primary reviewer, EVL, SH, PF, and GT provided  
22  
23 309 feedback and comments. SH and EVL will be acting as secondary reviewers. PF and GT, of  
24  
25 310 SIGHT will be providing continued support and connecting to relevant actors working in this area.  
26  
27

28 311

### 29 30 312 **ACKNOWLEDGMENTS**

31  
32  
33 313 The authors would like to thank Karolinska Institutet librarians, Magdalena Svanberg and Gun  
34  
35 314 Brit Knutssön, for their contributions, specifically in running the search and identifying  
36  
37 315 appropriate databases. We are also grateful to WHO Euro for their discussions and suggestions  
38  
39 316 in the early stages of this project.  
40  
41

42 317

### 43 44 318 **COMPETING INTERESTS AND FUNDING STATEMENT**

45  
46  
47 319 The authors have no competing interests to declare. No funding was obtained for this project. In-  
48  
49 320 kind time contributions from staff at the Alliance for Health Policy and Systems Research and  
50  
51 321 Swedish Institute for Global Health Transformation, SIGHT, through support from the Bill and  
52  
53 322 Melinda Gates Foundation, have made this possible.  
54  
55

### 56 57 323 **REFERENCES**

58  
59  
60



- 1  
2  
3 324 1. OHCHR. The Right to Health Geneva, Switzerland: Office of the United Nations High  
4 325 Commissioner for Human Rights & WHO, 2008.
- 5 326 2. Tangcharoensathien V, Mills A, Palu T. Accelerating health equity: the key role of universal  
6 327 health coverage in the Sustainable Development Goals. *BMC Medicine* 2015; **13**(1): 101.
- 7 328 3. Rechel B, Mladovsky P, Ingleby D, Mackenbach JP, McKee M. Migration and health in an  
8 329 increasingly diverse Europe. *Lancet* 2013; **381**(9873): 1235-45.
- 9 330 4. Langlois EV, Haines A, Tomson G, Ghaffar A. Refugees: towards better access to health-care  
10 331 services. *Lancet* 2016; **387**(10016): 319-21.
- 11 332 5. UNHCR. Convention and Protocol relating to the status of refugees. Geneva, Switzerland United  
12 333 Nations High Commissioner for Refugees, 2010.
- 13 334 6. UNHCR. UNHCR viewpoint: 'Refugee' or 'migrant' – Which is right? UNHCR. Geneva,  
14 335 Switzerland; 2016.
- 15 336 7. Council for the EU. Council Directive 2003/9/EC of 27 January 2003 laying down minimum  
16 337 standards for the reception of asylum seekers. *Official Journal of the European Union* 2003; **L31/18**.
- 17 338 8. discrimination Coteor. General Recommendation 30: Discrimination against non-citizens.  
18 339 Committee on the elimination of racial discrimination; 2004; 2004.
- 19 340 9. Norredam M, Mygind A, Krasnik A. Access to health care for asylum seekers in the European  
20 341 Union--a comparative study of country policies. *Eur J Public Health* 2006; **16**(3): 286-90.
- 21 342 10. Jackson Bowers IC. Meeting the primary health care needs of refugees and asylum seekers.  
22 343 *PHCRIS Research Roundup* 2010; (16).
- 23 344 11. WHO. Advancing the right to health: the vital role of law. Geneva, Switzerland: World Health  
24 345 Organization, O'Neil Institute, International Development Law Organization, University of Sydney, 2017.
- 25 346 12. Joshi C, Russell G, Cheng IH, et al. A narrative synthesis of the impact of primary health care  
26 347 delivery models for refugees in resettlement countries on access, quality and coordination. *Int J Equity*  
27 348 *Health* 2013; **12**: 88.
- 28 349 13. Department of Immigration and Border Protection. Fact sheet 60 - Australia's refugee and  
29 350 humanitarian program. Canberra: Australian Government: Department of Immigration and Border  
30 351 Protection, 2010.
- 31 352 14. UN. Integrated Approaches to Sustainable Development Planning and Implementation. New  
32 353 York, USA: United Nations, 2015.
- 33 354 15. Kett ME. Internally Displaced Peoples in Bosnia-Herzegovina: Impacts of Long-term  
34 355 Displacement on Health and Well-being. *Medicine, Conflict and Survival* 2005; **21**(3): 199-215.
- 35 356 16. Patel N, Kellezi B, Williams AC. Psychological, social and welfare interventions for psychological  
36 357 health and well-being of torture survivors. *Cochrane Database Syst Rev* 2014; (11): CD009317.
- 37 358 17. Micah Peters CG, Patricia McInerney, Cassia Soares, Hanan Khalil, Deborah Parker. The Joanna  
38 359 Briggs Institute Reviewers' Manual: Methodology for JBI Scoping Review. South Australia: Joanna Briggs  
39 360 Institute, 2015.
- 40 361 18. Arksey H, O'Malley L. Scoping studies: towards a methodological framework. *International*  
41 362 *Journal of Social Research Methodology* 2005; **8**(1): 19-32.
- 42 363 19. Moher D, Shamseer L, Clarke M, et al. Preferred reporting items for systematic review and meta-  
43 364 analysis protocols (PRISMA-P) 2015 statement. *Systematic Reviews* 2015; **4**(1): 1.
- 44 365 20. Atun R, de Jongh T, Secci F, Ohiri K, Adeyi O. Integration of targeted health interventions into  
45 366 health systems: a conceptual framework for analysis. *Health Policy and Planning* 2010; **25**(2): 104-11.
- 46 367 21. WHO. Health in All Policies: Framework for Country Action France: World Health Organization,  
47 368 Finland Ministry of Social Affairs and Health, 2014.
- 48 369 22. Walt G, Shiffman J, Schneider H, Murray SF, Brugha R, Gilson L. 'Doing' health policy analysis:  
49 370 methodological and conceptual reflections and challenges. *Health Policy and Planning* 2008; **23**(5): 308-  
50 371 17.

372 23. NVivo. NVivo 10. . Australia: International QSR; 2012.

373

374

375

376

377

378

379

380 **Appendix I**

381 **1. Medline(Ovid)**

|                                                                                                                                                                                                                                                                                                                                                                                                                                                                                                                                                                                                                                                     |                                                                                                                                                          |
|-----------------------------------------------------------------------------------------------------------------------------------------------------------------------------------------------------------------------------------------------------------------------------------------------------------------------------------------------------------------------------------------------------------------------------------------------------------------------------------------------------------------------------------------------------------------------------------------------------------------------------------------------------|----------------------------------------------------------------------------------------------------------------------------------------------------------|
| <p>Date of Search: 2016-11-03</p> <p>Number of hits: 2019</p> <p>Comments:</p>                                                                                                                                                                                                                                                                                                                                                                                                                                                                                                                                                                      | <p>Field labels:</p> <p>.tw,kf. = title, abstract, keyword</p> <p>exp/ = MeSH, exploded</p> <p>/ = MeSH, not exploded</p> <p>adj3 = within two words</p> |
| <p>1. Refugees/<br/>                 2. exp "Emigrants and Immigrants"/<br/>                 3. "Emigration and Immigration"/<br/>                 4. "Transients and Migrants"/<br/>                 5. (refugee* or immigra* or migrat* or migrant* or asylum* or transient*).tw,kf.<br/>                 6. or/1-5</p> <p>7. Delivery of Health Care/<br/>                 8. Health Services Accessibility/<br/>                 9. Patient Acceptance of Health Care/<br/>                 10. "Health Services Needs and Demand"/<br/>                 11. Quality of Health Care/<br/>                 12. Interinstitutional Relations/</p> |                                                                                                                                                          |

- 1  
2  
3  
4  
5  
6  
7  
8  
9  
10  
11  
12  
13  
14  
15  
16  
17  
18  
19  
20  
21  
22  
23  
24  
25  
26  
27  
28  
29  
30  
31  
32  
33  
34
13. Interdepartmental Relations/  
14. Public-Private Sector Partnerships/  
15. ((health care or healthcare or health service\*) adj3 (access\* or availab\* or barrier\* or deliver\* or need\* or provision\* or seeking or quality or utilization)).tw,kf.  
16. ((multisector\* or multi-sector\* or intersector\* or inter-sector\* or crosssector\* or cross-sector\* or interdisciplinary or inter-disciplinary or multidisciplinary or multi-disciplinary or interinstitution\* or inter-institution\* or interdepartment\* or inter-department\*) adj3 (analysis or collaborat\* or cooperat\* or co-operat\* or approach\* or partnership\* or relation\*)).tw,kf.  
17. or/7-16
18. Healthcare Disparities/  
19. Social Determinants of Health/  
20. Health Status Disparities/  
21. Health Equity/  
22. exp Human Rights/  
23. ((health or health care or healthcare or health service\*) adj3 (situation or difference\*)).tw,kf.  
24. (disparit\* or equity or equities or inequity or inequities or equalit\* or inequalit\* or right\* or injustice\* or discrimination\* or determinant\* or disadvantage\* or vulnerab\*).tw,kf.  
25. or/18-24  
26. 6 and 17 and 25
27. Remove duplicates from 26
28. limit 27 to yr="2000 -Current"

382

383

## 2. Web of Science (Thomson Reuter)

Date of Search: 2016-11-03

Number of hits: 1.166

Comments:

Field labels:

TOPIC = title, abstract, keywords

NEAR/3 = within 3 words

#1 TOPIC: (refugee\* or immigra\* or migrat\* or migrant\* or asylum\* or transient\*)

#2 TOPIC: (("health care" or healthcare or "health service\*") NEAR/3 (access\* or availab\* or barrier\* or deliver\* or need\* or provision\* or seeking or quality or utilization))

#3 TOPIC: ((multisector\* or multi-sector\* or intersector\* or inter-sector\* or crosssector\* or cross-sector\* or interdisciplinary or inter-disciplinary or multidisciplinary or multi-disciplinary or interinstitution\* or inter-institution\* or interdepartment\* or inter-department\*) NEAR/3 (analysis or collaborat\* or cooperat\* or co-operat\* or approach\* or partnership\* or relation\*))

17

1  
2  
3  
4 #4 #3 OR #2  
5  
6  
7

8 #5 TOPIC: ((health or "health care" or healthcare or "health service\*") NEAR/3 (situation or difference\*))  
9

10 #6 TOPIC: (disparit\* or equity or equities or inequity or inequities or equalit\* or inequalit\* or "human right\*"  
11 or "civil right\*" or "citizen\* right\*" or "social right\*" or injustice\* or discrimination\* or determinant\* or  
12 disadvantage\* or vulnerab\*)  
13

14  
15 #7 #6 OR #5  
16  
17

18 #8 #7 AND #4 AND #1  
19

20 #9 Timespan: 2000-2016.  
21  
22

23  
24 384

25  
26 385  
27  
28  
29  
30  
31  
32  
33  
34  
35  
36  
37  
38  
39  
40  
41  
42  
43  
44  
45  
46  
47  
48  
49  
50  
51  
52  
53  
54  
55  
56  
57  
58  
59  
60

386

## 3. Global Health (Ovid)

Date of Search: 2016-11-03

Number of hits: 497

Comments:

Field labels:

.ab,ti. = title, abstract

exp/ =thesaurus term, exploded

/ = thesaurus term, not exploded

adj3 = within two words

1. refugees/
2. immigrants/
3. migrants/
4. immigration/
5. (refugee\* or immigra\* or migrat\* or migrant\* or asylum\* or transient\*).ab,ti.
6. or/1-5
7. health care utilization/
8. ((health care or healthcare or health service\*) adj3 (access\* or availab\* or barrier\* or deliver\* or need\* or provision\* or seeking or quality or utilization)).ab,ti.
9. ((multisector\* or multi-sector\* or intersector\* or inter-sector\* or crosssector\* or cross-sector\* or interdisciplinary or inter-disciplinary or multidisciplinary or multi-disciplinary or interinstitution\* or inter-institution\* or interdepartment\* or inter-department\*) adj3 (analysis or collaborat\* or cooperat\* or co-operat\* or approach\* or partnership\* or relation\*)).ti,ab.
10. or/8-9
11. exp disparity/
12. exp discrimination/
13. human rights/
14. ((health or health care or healthcare or health service\*) adj3 (situation or difference\*)).ti,ab.
15. (disparit\* or equity or equities or inequity or inequities or equalit\* or inequalit\* or right\* or injustice\* or discrimination\* or determinant\* or disadvantage\* or vulnerab\*).ti,ab.
16. or/11-15
17. 6 and 10 and 16
18. limit 17 to yr="2000 -Current"

387

388

389

## 4. PsycInfo (OVID)

Date of Search: 2016-11-03

Number of hits: 667

Comments:

Field labels:

.ti,ab,id. = title, abstract, keyword

exp/ = subject heading, exploded

/ = subject heading, not exploded

adj3 = within two words

1. exp Human Migration/

2. Immigration/

3. (refugee\* or immigra\* or migrat\* or migrant\* or asylum\* or transient\*).ti,ab,id.

4. or/1-3

5. Health Care Delivery/

6. Health Care Utilization/

7. Health Care Seeking Behavior/

8. Health Service Needs/

9. "Quality of Care"/

10. ((health care or healthcare or health service\*) adj3 (access\* or availab\* or barrier\* or deliver\* or need\* or provision\* or seeking or quality or utilization)).ti,ab,id.

11. ((multisector\* or multi-sector\* or intersector\* or inter-sector\* or crosssector\* or cross-sector\* or interdisciplinary or inter-disciplinary or multidisciplinary or multi-disciplinary or interinstitution\* or inter-institution\* or interdepartment\* or inter-department\*) adj3 (analysis or collaborat\* or cooperat\* or co-operat\* or approach\* or partnership\* or relation\*)).ti,ab,id.

12. or/5-11

13. Health Disparities/

14. Social Equality/

15. exp Human Rights/

16. ((health or health care or healthcare or health service\*) adj3 (situation or difference\*)).ti,ab,id.

17. (disparit\* or equity or equities or inequity or inequities or equalit\* or inequalit\* human right\* or civil right\* or citizen\* right\* or social right\* or injustice\* or discrimination\* or determinant\* or disadvantage\* or vulnerab\*).ti,ab,id.

18. or/13-17

19. 4 and 12 and 18

20. limit 19 to yr="2000 -Current"

390

391

392

| Topic                              | Item No | Checklist item                                                                                                                                                                  |
|------------------------------------|---------|---------------------------------------------------------------------------------------------------------------------------------------------------------------------------------|
| <b>Administrative information</b>  |         |                                                                                                                                                                                 |
| Title:                             |         |                                                                                                                                                                                 |
| Identification                     | 1a      | <b>Intersectoral approaches in achieving the right to health for refugees upon resettlement: A scoping review Protocol</b><br>Report is identified as scoping review (Page 1,2) |
| Update                             | 1b      | NA                                                                                                                                                                              |
| Registration                       | 2       | Registered on Open Science Framework at <a href="https://osf.io/gt9ck/">https://osf.io/gt9ck/</a>                                                                               |
| Authors:                           |         |                                                                                                                                                                                 |
| Contact                            | 3a      | Provided (Page 1)                                                                                                                                                               |
| Contributions                      | 3b      | Provided (Page 13)                                                                                                                                                              |
| Amendments                         | 4       | NA                                                                                                                                                                              |
| Support:                           |         |                                                                                                                                                                                 |
| Sources                            | 5a      | NA                                                                                                                                                                              |
| Sponsor                            | 5b      | NA                                                                                                                                                                              |
| Role of sponsor or funder          | 5c      | Provided (Page 14)                                                                                                                                                              |
| <b>Introduction</b>                |         |                                                                                                                                                                                 |
| Rationale                          | 6       | Provided (Page 4-5)                                                                                                                                                             |
| Objectives                         | 7       | Provided (Page 5)                                                                                                                                                               |
| <b>Methods</b>                     |         |                                                                                                                                                                                 |
| Eligibility criteria               | 8       | Provided (Page 8-10)                                                                                                                                                            |
| Information sources                | 9       | Provided (Page 9)                                                                                                                                                               |
| Search strategy                    | 10      | Provided (Page 9-10; Page 16-19)                                                                                                                                                |
| Study records:                     |         |                                                                                                                                                                                 |
| Data management                    | 11a     | Provided (Page 10)                                                                                                                                                              |
| Selection process                  | 11b     | Provided (Page 10)                                                                                                                                                              |
| Data collection process            | 11c     | Provided (Page 11)                                                                                                                                                              |
| Data items                         | 12      | Provided (Page 11)                                                                                                                                                              |
| Outcomes and prioritization        | 13      | Provided (Page 12-13)                                                                                                                                                           |
| Risk of bias in individual studies | 14      | NA                                                                                                                                                                              |

| Topic                             | Item No | Checklist item     |
|-----------------------------------|---------|--------------------|
| Data synthesis                    | 15a     | Provided (Page 12) |
|                                   | 15b     | Provided (Page 12) |
|                                   | 15c     | Provided (Page 12) |
|                                   | 15d     | Provided (Page 12) |
| Meta-bias(es)                     | 16      | Provided (Page 12) |
| Confidence in cumulative evidence | 17      | NA                 |

For peer review only



# BMJ Open

## Intersectoral approaches and integrated services in achieving the right to health for refugees upon resettlement: A scoping review Protocol

|                                 |                                                                                                                                                                                                         |
|---------------------------------|---------------------------------------------------------------------------------------------------------------------------------------------------------------------------------------------------------|
| Journal:                        | <i>BMJ Open</i>                                                                                                                                                                                         |
| Manuscript ID                   | bmjopen-2017-016638.R1                                                                                                                                                                                  |
| Article Type:                   | Protocol                                                                                                                                                                                                |
| Date Submitted by the Author:   | 16-May-2017                                                                                                                                                                                             |
| Complete List of Authors:       | Javadi, Dena; World Health Organization<br>Langlois, Etienne V.; WHO<br>Ho, Shirley; Johns Hopkins University<br>Friberg, Peter; Medicine, Clinical Physiology<br>Tomson, Göran ; Karolinska Institutet |
| <b>Primary Subject Heading</b>: | Health services research                                                                                                                                                                                |
| Secondary Subject Heading:      | Ethics, Global health, Health policy, Public health, Qualitative research                                                                                                                               |
| Keywords:                       | intersectoral, refugees, human rights, integration, resettlement                                                                                                                                        |
|                                 |                                                                                                                                                                                                         |

SCHOLARONE™  
Manuscripts

1  
2  
3  
4 1 **Intersectoral approaches and integrated services in achieving the right to health for**  
5  
6 2 **refugees upon resettlement:**

7  
8 3 **A scoping review Protocol**  
9  
10 4

11 5 Dena Javadi \*<sup>1</sup> email: javadid@who.int  
12 6 Etienne V. Langlois<sup>1</sup> email: langloise@who.int  
13 7 Shirley Ho<sup>1</sup> email: Shirley.ho@jhu.edu  
14 8 Peter Friberg<sup>2,4</sup> email: peter.friberg@mednet.gu.se  
15 9 Goran Tomson<sup>2,3</sup> email: Goran.Tomson@ki.se  
16  
17  
18  
19  
20  
21  
22

1 11 <sup>1</sup> Alliance for Health Policy and Systems Research, World Health Organization, Avenue Appia  
2 12 20, 1211 Geneva, Switzerland.

3 13 <sup>2</sup> Swedish Institute for Global Health Transformation, SIGHT, Royal Swedish Academy of  
4 14 Sciences, Stockholm, Sweden

5 15 <sup>3</sup> Health System and Policy, Global Health, Karolinska Institutet, Stockholm, Sweden

6 16 <sup>4</sup> Molecular and clinical medicine, Sahlgrens Academy and university hospital, Gothenburg  
7 17 university, Gothenburg, Sweden

8 18 **\*Corresponding Author:**

9 19 Dena Javadi, javadid@who.int  
10 20 Technical Officer, Alliance for Health Policy and Systems Research

11 21 **Word count:** 3,150

12 22 **Keywords:** intersectoral, human rights, access, refugees, integration, resettlement



### 45 **Strengths and Limitations:**

- 46 • Many programmes exist to attempt to address the unique challenges faced by refugees  
47 but these are largely unevaluated and face challenges to sustainability. This scoping  
48 review will summarize lessons learned from these programmes by exploring barriers and  
49 facilitators to the integration of health services for refugees; the content, process and  
50 actors involved in protecting refugee health; and the extent to which intersectoral  
51 approaches are leveraged to protect refugees' right to health upon resettlement, especially  
52 for vulnerable groups such as women and children.
- 53 • This study will be limited by the quality of the literature on health care programs for  
54 refugees and protection of their right to health.

### 55 **INTRODUCTION**

56 The Office of the United Nations High Commission for Human Rights (OHCHR) identifies the  
57 right to the enjoyment of the highest attainable standard of physical and mental health as a  
58 fundamental part of human rights, first articulated in the 1946 Constitution of the World Health  
59 Organization (WHO).<sup>1</sup> While the right to health includes access to health care and the hard  
60 infrastructure associated with that – such as hospitals and ambulances – it also includes the  
61 underlying determinants of health including, safe drinking water, adequate sanitation, safe food,  
62 adequate nutrition and housing, healthy working and environmental conditions, health related  
63 education and information, and gender equality.<sup>1</sup> Freedoms which protect individuals from non-  
64 consensual medical treatment, torture and other degrading treatment are also included in this  
65 definition. Furthermore, entitlements under the right to health include universal health coverage  
66 – now a target under Sustainable Development Goal 3 – broadly covering access to preventive  
67 and curative services, essential medicines, timely basic health services, health related education,  
68 and participation in health related decision making at both national and community levels.<sup>1,2</sup>  
69 Especially relevant to the plight of refugees, the right to health includes non-discrimination  
70 whereby health services, goods and facilities must be provided to all without any discrimination.  
71 Lastly, these health services must be available in sufficient quantity, accessible, medically and

1  
2  
3  
4 72 culturally acceptable, and of good quality, which includes having a trained health workforce, safe  
5  
6 73 products and adequate sanitation.<sup>2</sup>  
7

8  
9 74 The influx of refugees over the last few years makes the realization of these rights a legal and  
0  
1 75 logistical challenge.<sup>3,4</sup> Different in definition from the term “migrant,” “refugees” are those  
2  
3 76 fleeing armed conflict or persecution as defined by the 1951 Refugee Convention which also  
4  
5 77 identifies their basic rights, specifically that refugees should not be returned to situations that are  
6  
7 78 deemed a threat to their life or freedom.<sup>5</sup> A key distinction is that refugee rights are not only a  
8  
9 79 matter of national legislation, but also of international law.<sup>6</sup> Despite these legal protections,  
0  
1 80 refugees face many challenges in accessing health services, especially more vulnerable groups  
2  
3 81 like women and children.<sup>3,4</sup> Many states explicitly exclude refugees from the level of protection  
4  
5 82 afforded to their citizens, instead choosing to offer “essential care” or “emergency health care,”  
6  
7 83 which is differentially defined across countries.<sup>7</sup> The Committee on the Elimination of Racial  
8  
9 84 Discrimination, and the Committee on Economic, Social and Cultural Rights, both include  
0  
1 85 general comments that hold States accountable to “the right of non-citizens to an adequate  
2  
3 86 standard of physical and mental health by, inter alia, refraining from denying or limiting their  
4  
5 87 access to preventive, curative and palliative health services.”<sup>8</sup>  
6  
7

8  
9 88 However, the capacity of States to truly protect these rights is limited.<sup>9</sup> As the boundaries of the  
0  
1 89 right to health have expanded due to increased understanding of social determinants of health  
2  
3 90 and the health impacts of the lived environment, legal frameworks have been insufficient in  
4  
5 91 ensuring the protection of these rights.<sup>10,11</sup> Refugees are not only more likely to have poorer  
6  
7 92 health during resettlement, but they also face challenges in navigating legal, education, health,  
8  
9 93 housing and employment services, which further threatens their quality of life and health status.<sup>12</sup>  
0  
1 94 A lack of coordination and integration across these services undermines service effectiveness.<sup>13</sup>  
2  
3  
4  
5  
6  
7  
8  
9  
0

1  
2  
3 95 Much like the shift from the more vertical approaches of the millennium development goals  
4  
5 96 (MDGs) towards the more integrated sustainable development goals (SDGs), the protection of  
6  
7  
8 97 the right to health too calls for an intersectoral approach whereby health is applied to all policies  
9  
0  
1 98 for all people.<sup>14</sup> Therefore, for states to effectively protect the right to health for refugees there is  
2  
3 99 a need to work across sectors and disciplines to better integrate targeted programmes and  
4  
5 100 initiatives, thereby improving standards of care during resettlement. Evidence exists that  
6  
7  
8 101 supporting collaboration and coordination across social services improves the quality of care  
9  
0  
1 102 received and its effectiveness.<sup>12</sup> Furthermore, the refugee sub-population is diverse and requires  
2  
2 103 extraneous considerations in ensuring the right to health, not only as compared to the general  
2  
2 104 population, but also within the sub-population itself. Many fragmented psychosocial programmes  
3  
3 105 exist to attempt to address the unique challenges faced by refugees but these are largely  
4  
4 106 unevaluated and lack sustainability.<sup>15,16</sup> Better understanding, documentation, and reporting of  
5  
5 107 the dynamic nature of such interventions and their means of health system integration and  
6  
6 108 intersectoral collaboration, are necessary to ensure that lessons learned are communicated and  
7  
7 109 implemented in the design of future policies and programmes. This would promote continuity of  
8  
8 110 care, people-centred care, and sustainability of health and social services for refugees. Therefore,  
9  
9 111 we aim to conduct a scoping review to explore barriers and facilitators to integrated health  
0  
0 112 services for refugees; the content, process and actors involved in protecting refugee health; and  
1  
1 113 the extent to which intersectoral approaches are leveraged to protect refugees' right to health  
2  
2 114 upon resettlement. This paper will outline the protocol for this review. The specific research  
3  
3 115 questions for the review will be as follows:

- 4 116 (1) What are the barriers and facilitators (context) in integrating targeted services for  
5  
5 117 refugees within existing systems?

1  
2  
3  
4 118 (2) What strategies (content, process, and actors) are involved in addressing refugees' right  
5  
6 119 to health upon resettlement?  
7

8  
9 120 (3) To what extent are intersectoral approaches used to protect refugees' right to health,  
0  
1 121 particularly in women and children?  
2

## 3 122 **METHODS**

### 4 123 **Study Design**

5  
6  
7 124 This study will be conducted using the scoping review methodology as described by the Joanna  
8  
9  
0 125 Briggs Institute Methods Manual for scoping reviews.<sup>17</sup> Scoping reviews are used to map key  
1  
2 126 concepts in an area to identify the scope of practice, working definitions, conceptual boundaries,  
3  
4 127 and the types of evidence available. We opted for a scoping review due to the complex nature of  
5  
6 128 this topic, the changing global landscape around it, and the insufficient evidence base to support  
7  
8 129 effective decision making.<sup>18</sup>

9  
0  
1 130 The five stages outlined in a methodological framework for scoping studies are as follows: i)  
2  
3 131 identify the research question, ii) identify relevant studies, iii) study selection, iv) charting the  
4  
5 132 data, and v) collating, summarising and reporting results.<sup>18</sup>

### 6 133 **Protocol**

7  
8 134 The Preferred Reporting Items for Systematic Reviews and Meta-analysis for Protocols  
9  
0 135 (PRISMA-P) checklist were used in drafting this protocol.<sup>19</sup>

### 1 136 **Frameworks to address research questions**

2  
3 137 While some evidence suggests that improved collaboration and coordination across social sectors  
4  
5 138 can contribute to enhancing refugee health, there remains a need for a stronger evidence base on  
6  
7 139 the context, processes and actors involved in protecting refugees' right to health upon  
8  
9 140 resettlement.<sup>12</sup> Therefore, the research questions identified for this scoping review focus on  
0

1  
2  
3 141 integration and use of intersectoral approaches to address the complex needs of this vulnerable  
4  
5  
6 142 population. Two frameworks are being used concurrently in order to comprehensively identify  
7  
8 143 barriers, facilitators, processes, and actors involved at various stages in programme planning and  
9  
0  
1 144 implementation. The first is a framework for analyzing integration of targeted health  
2  
3 145 interventions in systems, where integration is defined as “the extent, pattern, and rate of adoption  
4  
5 146 and eventual assimilation of health interventions into each of the critical functions of a health  
6  
7  
8 147 system.”<sup>20</sup> Elements in this framework include (i) governance, (ii) financing, (iii) planning, (iv)  
9  
0 148 service delivery, (v) monitoring and evaluation (M&E), and (vi) demand generation.<sup>20</sup> To be  
1  
2  
2 149 considered integrated, a health system intervention needs to fulfill certain requirements across  
3  
4 150 these six areas as defined by the framework.<sup>20</sup> We define an intervention here as *changes in*  
5  
6 151 *service delivery, organizational models, process modification, or new technologies*. To satisfy  
7  
8  
9 152 governance needs for integration, governance and regulatory mechanisms for the intervention  
0  
1 153 match those of the general health system.<sup>20</sup> For financing, full integration has occurred when  
2  
3 154 funding is incurred from national or regional budgets.<sup>20</sup> In planning – which constitutes needs  
4  
5 155 assessment, priority setting and resource allocation – full integration occurs when the same  
6  
7 156 institutions and stakeholders are involved as those planning general health/ other social  
8  
9 157 systems.<sup>20</sup> If service delivery is the responsibility of general staff embedded in the system, the  
0  
1 158 intervention is considered integrated.<sup>20</sup> Similarly, if monitoring and evaluation was conducted by  
2  
3 159 those with overall M&E responsibility, then the intervention is considered integrated.<sup>20</sup> Finally,  
4  
5 160 demand generation is seen as integrated where services were promoted and incentivized by  
6  
7 161 general staff within the existing system.<sup>20</sup>  
8  
9 162 The second framework applied is that of the Health in All Policies (HiAP) framework for  
0  
1 163 country action. HiAP is defined as a way for countries to protect population health through “an



1  
2  
3  
4 164 approach to public policies across sectors that systematically takes into account the health  
5  
6 165 implications of decisions, seeks synergies, and avoids harmful health impacts in order to improve  
7  
8 166 population health and health equity.”<sup>21</sup> HiAP can be a powerful tool for enhancing accountability  
9  
0  
1 167 and safeguarding against distortions imposed by deleterious commercial and political interests.  
2  
3 168 HiAP is in line with the human rights principles of legitimacy, protected by national and  
4  
5 169 international law, accountability of governments to people, transparency of decision making,  
6  
7 170 participation of the wider society, sustainability of policies to meet current needs without  
8  
9 171 compromising future ones, and collaboration across sectors and levels of government.<sup>11,21</sup> The  
0  
1 172 HiAP framework for action involves six components including: i) establish the need and  
2  
3 173 priorities for HiAP, ii) frame planned action, iii) identify supportive structures and policies, iv)  
4  
5 174 facilitate assessment and engagement, v) ensure monitoring and evaluation, and vi) build  
6  
7 175 capacity.<sup>21</sup> These six components, adapted to refugee needs, will be used in the scoping review to  
8  
9 176 frame barriers and facilitators in integrating refugee services across sectors through intersectoral  
0  
1 177 collaboration. The framework for integration will then be used to assess the extent to which  
2  
3 178 provisions for protecting refugees’ right to health are integrated into existing social systems, and  
4  
5 179 the content, process, and actors involved in integration.<sup>22</sup>

#### 180 **Identifying relevant studies**

181 **Population:** Eligible studies and papers will include those targeting refugees and asylum-seekers  
182 as previously defined. We are not including other categories of migrants as their legal  
183 entitlements are different to those of refugees which are protected under international law.

184 **Intervention:** Eligible studies and papers will describe a programme, approach or technical  
185 innovation that aims to protect refugees’ right to health, including interventions aimed at  
186 addressing the social determinants of health. Interventions outside of the health sector that affect

1  
2  
3 187 health will be included. If the studies do not display some level of integration or intersectorality,  
4  
5 188 based on the frameworks for integration and HiAP, they will not be assessed further.<sup>20,21</sup> This  
6  
7  
8 189 will be determined using a data abstraction chart where the key elements of the two frameworks  
9  
0  
1 190 will be laid out and contrasted against the studies found.

2  
3 191 **Comparators:** Eligible studies and papers do not necessarily have to display a comparator as this  
4  
5 192 scoping review is meant to gauge the state of the evidence. Where comparators exist, any types  
6  
7  
8 193 are relevant for inclusion, for example those comparing a parallel approach to service provision  
9  
0  
1 194 for refugees versus an integrated approach.

2  
3 195 **Outcomes:** Eligible studies and papers will include those discussing plans for action, strategies,  
4  
5 196 barriers, facilitators or outcomes in integrating refugee health using an integrated or intersectoral  
6  
7  
8 197 approach. Studies or commentaries that solely discuss theories and conceptual models will be  
9  
0  
1 198 excluded.

2  
3 199 **Study design:** Qualitative, quantitative, and mixed methods will be eligible for inclusion.  
4  
5 200 Experimental designing including randomized controlled trials, non-randomized controlled trials  
6  
7  
8 201 and quasi-experimental models will be included, as well as observation and qualitative studies  
9  
0  
1 202 including cohort, cross sectional, case series, ethnographic, interview/based, and focus-group  
2  
3 203 discussion based studies. Grey literature that explores plans, strategies, barriers, facilitators or  
4  
5  
6 204 outcomes of refugee health, as well as implementation research and operations research studies  
7  
8  
9 205 will also be included. Studies or report outlining stakeholder experiences and plans will also be  
0  
1 206 included as case studies.

2  
3 207 **Time period:** In order to ensure relevance, only studies from 2000 onward (search completed  
4  
5 208 May 8<sup>th</sup> 2017) have been included, making the study period range over 16 years. It is estimated  
6  
7  
8 209 that the review will be completed by January 2018.

1  
2  
3 210 **Setting:** Eligible studies will be set in countries receiving refugees and asylum seekers (who may  
4  
5  
6 211 eventually qualify for refugee status) and serving as hosts for resettlement.  
7

### 8 212 **Information sources and search strategy**

9  
0 213 Based on the study team's concepts for the review, an experienced team of librarians from  
1  
2 214 Karolinska Institutet have conducted a search of articles from 2000 to May 2017 in the following  
3  
4 215 electronic databases: MEDLINE, Web of Science, Global Health, and PsycInfo Embase. The  
5  
6 216 three concepts used to create the search strategy included: i) refugees and asylum-seekers; ii)  
7  
8 217 type of service provision (health sector service delivery, intersectoral approaches, partnerships,  
9  
0 218 integration); and iii) health equity, human rights and social determinants of health. See appendix  
1  
2 219 I for search strategy.  
3

4 220 The search of the peer-reviewed literature will be supplemented by a search of grey literature  
5  
6 221 through government websites, particularly governments of countries that receive the highest  
7  
8 222 refugee burden, reports from multi-nationals and non-governmental organizations, conference  
9  
0 223 abstracts, dissertations, and news articles. Any additional report and articles will be identified by  
1  
2 224 reaching out to relevant stakeholders in the authors' professional networks, including those  
3  
4 225 involved in the European refugee response.  
5

### 6 226 **Study selection process**

7 227 Search results will be cleaned for duplicates and uploaded to an excel document, which will be  
8  
9 228 used for screening using the eligibility criteria described above.  
0

1 229 Two members of the study team will screen results based on the screening tool discussed. Inter-  
2  
3 230 rater reliability will be assessed based on a set of 100 initial screens, and adjustments and  
4  
5 231 clarifications to the screening tool will be made if reliability is not as high as desired (above  
6  
7 232 80%). Once a set of included studies and papers are identified, two reviewers will independently  
8  
9  
0

1  
2  
3 233 conduct a full-text screen in order to apply the aforementioned frameworks for integration and  
4  
5  
6 234 intersectorality (HiAP). Eligible studies will be those displaying integration or intersectorality,  
7  
8 235 defined as satisfying at least 2 of the 6 elements in either one of the integration or HiAP  
9  
0  
1 236 frameworks. A third reviewer has been identified in the event of disagreement between the two  
2  
3 237 reviewers. This will be followed by data abstraction, using a form derived from the two  
4  
5 238 framework, from the finalized set.

### 7 239 **Data abstraction and charting process**

8  
9 240 General data collected will include study design, setting, and journal discipline. Demographic  
0  
1 241 data collected will include context, target study group (gender, age, ethnic background), number  
2  
3 242 of participants, economy status of setting based on World Bank classifications, and level of the  
4  
5 243 health system where applicable (community, district, regional, etc.). Intervention-specific data  
6  
7 244 collected will include the type of intervention (behavioural, medical, social), the social  
8  
9 245 determinant of health being addressed (WHO commission on social determinants of health  
0  
1 246 framework)<sup>23</sup>, the primary sector(s) involved (health, education, law enforcement, housing, etc.),  
2  
3 247 duration, resources, funding source, and conceptual framework applied if any. Outcome data  
4  
5 248 collected will include barriers, facilitators, strategies, plans, qualitative findings from interviews  
6  
7 249 and focus groups, and any unintended consequences. In the final set of included studies – those  
8  
9 250 displaying some level of integration or intersectorality – key elements will be charted according  
0  
1 251 to the two frameworks described above.<sup>18,20,21</sup> Data will be charted to include types of  
2  
3 252 stakeholders involved in (i) governance, (ii) financing, (iii) planning, (iv) service delivery, (v)  
4  
5 253 monitoring and evaluation (M&E), and (vi) demand generation.<sup>20</sup> This will assess the extent of  
6  
7 254 integration while data charted against the six components of the HiAP framework will assess the

1  
2  
3 255 intersectoral potential of the intervention. Two members of the study team will code studies on  
4  
5 256 NVivo software<sup>24</sup> using a coding guide based on the two frameworks used for the review.  
6  
7

8 257 The data abstraction form will be tested by both reviewers using 5 studies. Where there is a  
9  
0 258 sufficient level of agreement across reviewers (above 80%), data abstraction will continue as  
1  
2 259 designed. If agreement falls below the required range, the data abstraction form will be clarified.  
3  
4  
5 260 As this is a scoping review, meta-analysis will not be conducted.  
6  
7

### 8 261 **Risk of bias assessment**

9  
0 262 In line with the manual used to design this scoping review, risk of bias assessments will not be  
1  
2 263 conducted.<sup>17</sup>  
3  
4

### 5 264 **Results**

6 265 Frequency tables will be used to describe included studies quantitatively while narratives will be  
7  
8 266 used to describe interventions, barriers, facilitators, and other qualitative outcomes. Stakeholders  
9  
0 267 will be presented based on the combined integration and HiAP frameworks, with their roles and  
1  
2 268 involvement in the studies outlined. If a sufficiently diverse range of studies are identified,  
3  
4 269 stratification by health system level (community, district, region) and country economy status  
5  
6 270 will be done.  
7  
8

9 271 Charted data will be mapped out into subcategories to allow for a narrative description of  
0  
1 272 barriers and facilitators, including barriers specific to vulnerable groups (women, children,  
2  
3 273 torture survivors, those with disabilities, etc.). New themes will be added where necessary and  
4  
5 274 elements of integration and/or intersectorality that are more or less prevalent across included  
6  
7 275 studies will be highlighted. Finally, context, content, process and actors will be mapped based  
8  
9 276 on charted data in accordance with the Walt Policy Triangle.<sup>22</sup> Vulnerabilities of specific groups  
0  
1 277 such as women and children will be highlighted.  
2  
3  
4  
5  
6  
7  
8  
9  
0

1  
2  
3 278 **DISCUSSION**  
4

5  
6 279 **Implications**  
7

8 280 This scoping review will identify programmes, approaches and interventions both within and  
9  
0 281 outside the health sector that promote and protect refugees' right to health directly or indirectly  
1  
2  
3 282 through social determinants of health. To support country-level decision making and resettlement  
4  
5 283 efforts, this review will provide an understanding of the extent of integration and intersectoral  
6  
7 284 collaboration currently reported in this area, barriers and facilitators to provision of such services  
8  
9 285 and their integration, and key stakeholders involved as well as those often missing. Findings will  
0  
1 286 be shared with WHO colleagues working in this area, the Alliance for Health Policy and Systems  
2  
3 287 Research contacts, and a network of policy makers who will in turn share with their national and  
4  
5 288 local networks. Other expected outputs include an improved understanding of contextual factors  
6  
7 289 that are necessary in supporting the right to health for refugees as well as a narrative exploration  
8  
9 290 of whether intersectoral collaboration and the idea of "Health in All Policies" (HiAP) also works  
0  
1 291 to protect and promote the health of persons outside of the traditional definitions of citizenry.  
2  
3 292 These discussions will stimulate dialogue on how receiving countries can strengthen the  
4  
5 293 resilience of their social systems to enhance their capacity for effective resettlement and  
6  
7 294 improved health outcomes in their refugee populations.

8  
9  
0  
1  
2  
3 295 **Ethics and Dissemination**  
4

5 296 In addition to the study team's respective networks, this review will also be disseminated at  
6  
7 297 relevant conferences, meetings, and communities of practice focused on enhancing use of  
8  
9 298 evidence in policy making. A brief of key learnings will be created to support evidence-informed  
0  
1 299 decision making in this area.

2 300 Ethics approval is not required for this scoping review as human subjects are not involved.  
3  
4  
5  
6  
7  
8  
9  
0

## 301 AUTHOR'S CONTRIBUTIONS

302 DJ drafted the paper and will be acting as primary reviewer, EVL, SH, PF, and GT provided  
303 feedback and comments. SH and EVL will be acting as secondary reviewers. PF and GT, of  
304 SIGHT will be providing continued support and connecting to relevant actors working in this area.

## 306 ACKNOWLEDGMENTS

307 The authors would like to thank Karolinska Institutet librarians, Magdalena Svanberg and Gun  
308 Brit Knutssön, for their contributions, specifically in running the search and identifying  
309 appropriate databases. We are also grateful to WHO Euro, specifically Dr Santino Severoni and  
310 Sara Barragan Montes, for their discussions and suggestions in the early stages of this project.

## 312 COMPETING INTERESTS AND FUNDING STATEMENT

313 The authors have no competing interests to declare. No funding was obtained for this project. In-  
314 kind time contributions from staff at the Alliance for Health Policy and Systems Research and  
315 Swedish Institute for Global Health Transformation, SIGHT, through support from the Bill and  
316 Melinda Gates Foundation, have made this possible.

## 317 REFERENCES

- 318 1. OHCHR. The Right to Health Geneva, Switzerland: Office of the United Nations High  
319 Commissioner for Human Rights & WHO, 2008.
- 320 2. Tangcharoensathien V, Mills A, Palu T. Accelerating health equity: the key role of universal  
321 health coverage in the Sustainable Development Goals. *BMC Medicine* 2015; **13**(1): 101.
- 322 3. Rechel B, Mladovsky P, Ingleby D, Mackenbach JP, McKee M. Migration and health in an  
323 increasingly diverse Europe. *Lancet* 2013; **381**(9873): 1235-45.
- 324 4. Langlois EV, Haines A, Tomson G, Ghaffar A. Refugees: towards better access to health-care  
325 services. *Lancet* 2016; **387**(10016): 319-21.
- 326 5. UNHCR. Convention and Protocol relating to the status of refugees. Geneva, Switzerland United  
327 Nations High Commissioner for Refugees, 2010.

- 1  
2  
3 328 6. UNHCR. UNHCR viewpoint: 'Refugee' or 'migrant' – Which is right? UNHCR. Geneva,  
4 329 Switzerland; 2016.
- 5 330 7. EU Cot. Council Directive 2003/9/EC of 27 January 2003 laying down minimum standards for the  
6 331 reception of asylum seekers. *Official Journal of the European Union* 2003; **L31/18**.
- 7 332 8. discrimination Coteor. General Recommendation 30: Discrimination against non-citizens.  
8 333 Committee on the elimination of racial discrimination; 2004; 2004.
- 9 334 9. Norredam M, Mygind A, Krasnik A. Access to health care for asylum seekers in the European  
0 335 Union--a comparative study of country policies. *Eur J Public Health* 2006; **16**(3): 286-90.
- 1 336 10. Jackson Bowers IC. Meeting the primary health care needs of refugees and asylum seekers.  
2 337 *PHCRIS Research Roundup* 2010; (16).
- 3 338 11. WHO. Advancing the right to health: the vital role of law. Geneva, Switzerland: World Health  
4 339 Organization, O'Neil Institute, International Development Law Organization, University of Sydney, 2017.
- 5 340 12. Joshi C, Russell G, Cheng IH, et al. A narrative synthesis of the impact of primary health care  
6 341 delivery models for refugees in resettlement countries on access, quality and coordination. *Int J Equity*  
7 342 *Health* 2013; **12**: 88.
- 8 343 13. Protection DolaB. Fact sheet 60 - Australia's refugee and humanitarian program. Canberra:  
9 344 Australian Government: Department of Immigration and Border Protection, 2010.
- 0 345 14. UN. Integrated Approaches to Sustainable Development Planning and Implementation. New  
1 346 York, USA: United Nations, 2015.
- 2 347 15. Kett ME. Internally Displaced Peoples in Bosnia-Herzegovina: Impacts of Long-term  
3 348 Displacement on Health and Well-being. *Medicine, Conflict and Survival* 2005; **21**(3): 199-215.
- 4 349 16. Patel N, Kellezi B, Williams AC. Psychological, social and welfare interventions for psychological  
5 350 health and well-being of torture survivors. *Cochrane Database Syst Rev* 2014; (11): CD009317.
- 6 351 17. Micah Peters CG, Patricia McInerney, Cassia Soares, Hanan Khalil, Deborah Parker. The Joanna  
7 352 Briggs Institute Reviewers' Manual: Methodology for JBI Scoping Review. South Australia: Joanna Briggs  
8 353 Institute, 2015.
- 9 354 18. Arksey H, O'Malley L. Scoping studies: towards a methodological framework. *International*  
0 355 *Journal of Social Research Methodology* 2005; **8**(1): 19-32.
- 1 356 19. Moher D, Shamseer L, Clarke M, et al. Preferred reporting items for systematic review and meta-  
2 357 analysis protocols (PRISMA-P) 2015 statement. *Systematic Reviews* 2015; **4**(1): 1.
- 3 358 20. Atun R, de Jongh T, Secci F, Ohiri K, Adeyi O. Integration of targeted health interventions into  
4 359 health systems: a conceptual framework for analysis. *Health Policy and Planning* 2010; **25**(2): 104-11.
- 5 360 21. WHO. Health in All Policies: Framework for Country Action France: World Health Organization,  
6 361 Finland Ministry of Social Affairs and Health, 2014.
- 7 362 22. Walt G, Shiffman J, Schneider H, Murray SF, Brugha R, Gilson L. 'Doing' health policy analysis:  
8 363 methodological and conceptual reflections and challenges. *Health Policy and Planning* 2008; **23**(5): 308-  
9 364 17.
- 0 365 23. WHO. A Conceptual Framework for Action on the Social Determinants of Health. Geneva: WHO,  
1 366 2010.
- 2 367 24. NVivo. NVivo 10. . Australia: International QSR; 2012.

368

369

370



## Appendix I

## 1. Medline(Ovid)

|                                                                                                                                                                                                                                                                                                                                                                                                                                                                                                                                                                                                                                                                                                                                                                                                                                                                                                                                                                                                                                                                                                                                                                                                                                                                                                                                                                                                                                                                                                                                                                                                                                                                                                                                                                                                                                                                                                                                                                 |                                                                                                                                                          |
|-----------------------------------------------------------------------------------------------------------------------------------------------------------------------------------------------------------------------------------------------------------------------------------------------------------------------------------------------------------------------------------------------------------------------------------------------------------------------------------------------------------------------------------------------------------------------------------------------------------------------------------------------------------------------------------------------------------------------------------------------------------------------------------------------------------------------------------------------------------------------------------------------------------------------------------------------------------------------------------------------------------------------------------------------------------------------------------------------------------------------------------------------------------------------------------------------------------------------------------------------------------------------------------------------------------------------------------------------------------------------------------------------------------------------------------------------------------------------------------------------------------------------------------------------------------------------------------------------------------------------------------------------------------------------------------------------------------------------------------------------------------------------------------------------------------------------------------------------------------------------------------------------------------------------------------------------------------------|----------------------------------------------------------------------------------------------------------------------------------------------------------|
| <p>Date of Search: 5 May 2017</p> <p>Number of hits: 2,766</p> <p>Comments:</p>                                                                                                                                                                                                                                                                                                                                                                                                                                                                                                                                                                                                                                                                                                                                                                                                                                                                                                                                                                                                                                                                                                                                                                                                                                                                                                                                                                                                                                                                                                                                                                                                                                                                                                                                                                                                                                                                                 | <p>Field labels:</p> <p>.tw,kf. = title, abstract, keyword</p> <p>exp/ = MeSH, exploded</p> <p>/ = MeSH, not exploded</p> <p>adj3 = within two words</p> |
| <ol style="list-style-type: none"> <li>1. Refugees/</li> <li>2. exp "Emigrants and Immigrants"/</li> <li>3. "Emigration and Immigration"/</li> <li>4. "Transients and Migrants"/</li> <li>5. (refugee* or immigra* or migrat* or migrant* or asylum* or transient*).tw,kf.</li> <li>6. or/1-5</li> <br/> <li>7. Delivery of Health Care/</li> <li>8. Health Services Accessibility/</li> <li>9. Patient Acceptance of Health Care/</li> <li>10. "Health Services Needs and Demand"/</li> <li>11. Quality of Health Care/</li> <li>12. Interinstitutional Relations/</li> <li>13. Interdepartmental Relations/</li> <li>14. Public-Private Sector Partnerships/</li> <li>15. ((health care or healthcare or health service*) adj3 (access* or availab* or barrier* or deliver* or need* or provision* or seeking or quality or utilization)).tw,kf.</li> <li>16. ((multisector* or multi-sector* or intersector* or inter-sector* or crosssector* or cross-sector* or interdisciplinary or inter-disciplinary or multidisciplinary or multi-disciplinary or interinstitution* or inter-institution* or interdepartment* or inter-department*) adj3 (analysis or collaborat* or cooperat* or co-operat* or approach* or partnership* or relation*)).tw,kf.</li> <li>17. or/7-16</li> <br/> <li>18. Healthcare Disparities/</li> <li>19. Social Determinants of Health/</li> <li>20. Health Status Disparities/</li> <li>21. Health Equity/</li> <li>22. exp Human Rights/</li> <li>23. Community Integration/</li> <li>24. Acculturation/</li> <li>25. ((health or health care or healthcare or health service*) adj3 (situation or difference*)).tw,kf.</li> <li>26. (disparit* or equity or equities or inequity or inequities or equalit* or inequalit* or right* or injustice* or discrimination* or determinant* or disadvantage* or vulnerab*).tw,kf.</li> <li>27. (acculturat* or assimilat* or integration).tw,kf.</li> <br/> <li>28. or/18-27</li> </ol> |                                                                                                                                                          |

1  
2  
3  
4  
5  
6  
7  
8  
9  
0  
1  
2  
3  
4  
5  
6  
7  
8  
9  
0  
1  
2  
3  
4  
5  
6  
7  
8  
9  
0  
1  
2  
3  
4  
5  
6  
7  
8  
9  
0  
1  
2  
3  
4  
5  
6  
7  
8  
9  
0  
1  
2  
3  
4  
5  
6  
7  
8  
9  
0

- 29. 6 and 17 and 28
- 30. remove duplicates from 29
- 31. limit 30 to yr="2000 -Current"

For peer review only

## 2. Web of Science (Thomson Reuter)

Date of Search: 8 May 2017

Number of hits: 1,727

Comments:

Field labels:

TOPIC = title, abstract, keywords

NEAR/3 = within 3 words

#1 TOPIC: (refugee\* or immigra\* or migrat\* or migrant\* or asylum\* or transient\*)

#2 TOPIC: (("health care" or healthcare or "health service\*") NEAR/3 (access\* or availab\* or barrier\* or deliver\* or need\* or provision\* or seeking or quality or utilization))

#3 TOPIC: ((multisector\* or multi-sector\* or intersector\* or inter-sector\* or crosssector\* or cross-sector\* or interdisciplinary or inter-disciplinary or multidisciplinary or multi-disciplinary or interinstitution\* or inter-institution\* or interdepartment\* or inter-department\*) NEAR/3 (analysis or collaborat\* or cooperat\* or co-operat\* or approach\* or partnership\* or relation\*))

#4 #3 OR #2

#5 TOPIC: ((health or "health care" or healthcare or "health service\*") NEAR/3 (situation or difference\*))

#6 TOPIC: (disparit\* or equity or equities or inequity or inequities or equalit\* or inequalit\* or "human right\*" or "civil right\*" or "citizen\* right\*" or "social right\*" or injustice\* or discrimination\* or determinant\* or disadvantage\* or vulnerab\* or acculturat\* or assmilat\* or integration)

#7 #6 OR #5

#8 #7 AND #4 AND #1

#9 Timespan: 2000-2017.

## 3. Global Health (Ovid)

Date of Search: 8 May 2017

Number of hits: 667

Comments:

Field labels:

.ab,ti. = title, abstract

exp/ =thesaurus term, exploded

/ = thesaurus term, not exploded

adj3 = within two words

1. refugees/

2. immigrants/

3. migrants/

4. immigration/

5. (refugee\* or immigra\* or migrat\* or migrant\* or asylum\* or transient\*).ab,ti.

6. or/1-5

7. health care utilization/

8. ((health care or healthcare or health service\*) adj3 (access\* or availab\* or barrier\* or deliver\* or need\* or provision\* or seeking or quality or utilization)).ab,ti.

9. ((multisector\* or multi-sector\* or intersector\* or inter-sector\* or crosssector\* or cross-sector\* or interdisciplinary or inter-disciplinary or multidisciplinary or multi-disciplinary or interinstitution\* or inter-institution\* or interdepartment\* or inter-department\*) adj3 (analysis or collaborat\* or cooperat\* or co-operat\* or approach\* or partnership\* or relation\*)).ab,ti.

10. or/7-9

11. exp disparity/

12. exp discrimination/

13. human rights/

14. cultural integration/

15. social integration/

16. acculturation/

17. ((health or health care or healthcare or health service\*) adj3 (situation or difference\*)).ti,ab.

18. (disparit\* or equity or equities or inequity or inequities or equalit\* or inequalit\* or right\* or injustice\* or discrimination\* or determinant\* or disadvantage\* or vulnerab\*).ti,ab.

19. (acculturat\* or assimilat\* or integration).ti,ab.

20. or/11-19

21. 6 and 10 and 20

22. limit 21 to yr="2000-Current"

## 4. PsycInfo (OVID)

Date of Search: 8 May 2017

Number of hits: 902

Comments:

Field labels:

.ti,ab,id. = title, abstract, keyword

exp/ = subject heading, exploded

/ = subject heading, not exploded

adj3 = within two words

1. exp Human Migration/

2. Immigration/

3. (refugee\* or immigra\* or migrat\* or migrant\* or asylum\* or transient\*).ti,ab,id.

4. or/1-3

5. Health Care Delivery/

6. Health Care Utilization/

7. Health Care Seeking Behavior/

8. Health Service Needs/

9. "Quality of Care"/

10. ((health care or healthcare or health service\*) adj3 (access\* or availab\* or barrier\* or deliver\* or need\* or provision\* or seeking or quality or utilization)).ti,ab,id.

11. ((multisector\* or multi-sector\* or intersector\* or inter-sector\* or crosssector\* or cross-sector\* or interdisciplinary or inter-disciplinary or multidisciplinary or multi-disciplinary or interinstitution\* or inter-institution\* or interdepartment\* or inter-department\*) adj3 (analysis or collaborat\* or cooperat\* or co-operat\* or approach\* or partnership\* or relation\*)).ti,ab,id.

12. or/5-11

13. Health Disparities/

14. Social Equality/

15. exp Human Rights/

16. exp Social integration/

17. Assimilation/

18. ((health or health care or healthcare or health service\*) adj3 (situation or difference\*)).ti,ab,id.

19. (disparit\* or equity or equities or inequity or inequities or equalit\* or inequalit\* or human right\* or civil right\* or citizen\* right\* or social right\* or injustice\* or discrimination\* or determinant\* or disadvantage\* or vulnerab\*).ti,ab,id.

20. (acculturat\* or assimilat\* or integration).ti,ab,id.

21. or/13-20

22. 4 and 12 and 21

23. limit 22 to yr="2000 -Current"

1  
2  
3  
4  
5  
6  
7  
8  
9  
0  
1  
2  
3  
4  
5  
6  
7  
8  
9  
0  
1  
2  
2  
2  
3  
3  
5  
6  
7  
8  
9  
0  
4  
4  
2  
3  
4  
5  
6  
7  
8  
9  
0

**PRISMA-P (Preferred Reporting Items for Systematic review and Meta-Analysis Protocols) 2015 checklist: recommended items to address in a systematic review protocol\***

| Section and topic                 | Item No | Checklist item                                                                                                                                                                                                                | Page                                                                                              |
|-----------------------------------|---------|-------------------------------------------------------------------------------------------------------------------------------------------------------------------------------------------------------------------------------|---------------------------------------------------------------------------------------------------|
| <b>ADMINISTRATIVE INFORMATION</b> |         |                                                                                                                                                                                                                               |                                                                                                   |
| Title:                            |         |                                                                                                                                                                                                                               |                                                                                                   |
| Identification                    | 1a      | Identify the report as a protocol of a systematic review                                                                                                                                                                      | 1, 2                                                                                              |
| Update                            | 1b      | If the protocol is for an update of a previous systematic review, identify as such                                                                                                                                            | NA                                                                                                |
| Registration                      | 2       | If registered, provide the name of the registry (such as PROSPERO) and registration number                                                                                                                                    | Registered on Open Science Framework at <a href="https://osf.io/gt9ck/">https://osf.io/gt9ck/</a> |
| Authors:                          |         |                                                                                                                                                                                                                               |                                                                                                   |
| Contact                           | 3a      | Provide name, institutional affiliation, e-mail address of all protocol authors; provide physical mailing address of corresponding author                                                                                     | 1                                                                                                 |
| Contributions                     | 3b      | Describe contributions of protocol authors and identify the guarantor of the review                                                                                                                                           | 13                                                                                                |
| Amendments                        | 4       | If the protocol represents an amendment of a previously completed or published protocol, identify as such and list changes; otherwise, state plan for documenting important protocol amendments                               | NA                                                                                                |
| Support:                          |         |                                                                                                                                                                                                                               |                                                                                                   |
| Sources                           | 5a      | Indicate sources of financial or other support for the review                                                                                                                                                                 | NA                                                                                                |
| Sponsor                           | 5b      | Provide name for the review funder and/or sponsor                                                                                                                                                                             | NA                                                                                                |
| Role of sponsor or funder         | 5c      | Describe roles of funder(s), sponsor(s), and/or institution(s), if any, in developing the protocol                                                                                                                            | 14                                                                                                |
| <b>INTRODUCTION</b>               |         |                                                                                                                                                                                                                               |                                                                                                   |
| Rationale                         | 6       | Describe the rationale for the review in the context of what is already known                                                                                                                                                 | 4-5                                                                                               |
| Objectives                        | 7       | Provide an explicit statement of the question(s) the review will address with reference to participants, interventions, comparators, and outcomes (PICO)                                                                      | 5-6                                                                                               |
| <b>METHODS</b>                    |         |                                                                                                                                                                                                                               |                                                                                                   |
| Eligibility criteria              | 8       | Specify the study characteristics (such as PICO, study design, setting, time frame) and report characteristics (such as years considered, language, publication status) to be used as criteria for eligibility for the review | 8-10                                                                                              |
| Information sources               | 9       | Describe all intended information sources (such as electronic databases, contact with study authors, trial registers or other grey literature sources) with planned dates of coverage                                         | 9                                                                                                 |

|                                    |     |                                                                                                                                                                                                                                                  |             |
|------------------------------------|-----|--------------------------------------------------------------------------------------------------------------------------------------------------------------------------------------------------------------------------------------------------|-------------|
| Search strategy                    | 10  | Present draft of search strategy to be used for at least one electronic database, including planned limits, such that it could be repeated                                                                                                       | 9-10; 16-20 |
| Study records:                     |     |                                                                                                                                                                                                                                                  |             |
| Data management                    | 11a | Describe the mechanism(s) that will be used to manage records and data throughout the review                                                                                                                                                     | 10-11       |
| Selection process                  | 11b | State the process that will be used for selecting studies (such as two independent reviewers) through each phase of the review (that is, screening, eligibility and inclusion in meta-analysis)                                                  | 10          |
| Data collection process            | 11c | Describe planned method of extracting data from reports (such as piloting forms, done independently, in duplicate), any processes for obtaining and confirming data from investigators                                                           | 11          |
| Data items                         | 12  | List and define all variables for which data will be sought (such as PICO items, funding sources), any pre-planned data assumptions and simplifications                                                                                          | 11          |
| Outcomes and prioritization        | 13  | List and define all outcomes for which data will be sought, including prioritization of main and additional outcomes, with rationale                                                                                                             | 11-12       |
| Risk of bias in individual studies | 14  | Describe anticipated methods for assessing risk of bias of individual studies, including whether this will be done at the outcome or study level, or both; state how this information will be used in data synthesis                             | NA          |
| Data synthesis                     | 15a | Describe criteria under which study data will be quantitatively synthesised                                                                                                                                                                      | 12          |
|                                    | 15b | If data are appropriate for quantitative synthesis, describe planned summary measures, methods of handling data and methods of combining data from studies, including any planned exploration of consistency (such as $I^2$ , Kendall's $\tau$ ) | 12          |
|                                    | 15c | Describe any proposed additional analyses (such as sensitivity or subgroup analyses, meta-regression)                                                                                                                                            | 12          |
|                                    | 15d | If quantitative synthesis is not appropriate, describe the type of summary planned                                                                                                                                                               | 12          |
| Meta-bias(es)                      | 16  | Specify any planned assessment of meta-bias(es) (such as publication bias across studies, selective reporting within studies)                                                                                                                    | 12          |
| Confidence in cumulative evidence  | 17  | Describe how the strength of the body of evidence will be assessed (such as GRADE)                                                                                                                                                               | NA          |

**\* It is strongly recommended that this checklist be read in conjunction with the PRISMA-P Explanation and Elaboration (cite when available) for important clarification on the items. Amendments to a review protocol should be tracked and dated. The copyright for PRISMA-P (including checklist) is held by the PRISMA-P Group and is distributed under a Creative Commons Attribution Licence 4.0.**

*From: Shamseer L, Moher D, Clarke M, Ghersi D, Liberati A, Petticrew M, Shekelle P, Stewart L, PRISMA-P Group. Preferred reporting items for systematic review and meta-analysis protocols (PRISMA-P) 2015: elaboration and explanation. BMJ. 2015 Jan 2;349(jan02 1):g7647.*

# BMJ Open

## Intersectoral approaches and integrated services in achieving the right to health for refugees upon resettlement: A scoping review Protocol

|                                 |                                                                                                                                                                                                         |
|---------------------------------|---------------------------------------------------------------------------------------------------------------------------------------------------------------------------------------------------------|
| Journal:                        | <i>BMJ Open</i>                                                                                                                                                                                         |
| Manuscript ID                   | bmjopen-2017-016638.R2                                                                                                                                                                                  |
| Article Type:                   | Protocol                                                                                                                                                                                                |
| Date Submitted by the Author:   | 12-Jun-2017                                                                                                                                                                                             |
| Complete List of Authors:       | Javadi, Dena; World Health Organization<br>Langlois, Etienne V.; WHO<br>Ho, Shirley; Johns Hopkins University<br>Friberg, Peter; Medicine, Clinical Physiology<br>Tomson, Göran ; Karolinska Institutet |
| <b>Primary Subject Heading</b>: | Health services research                                                                                                                                                                                |
| Secondary Subject Heading:      | Ethics, Global health, Health policy, Public health, Qualitative research                                                                                                                               |
| Keywords:                       | intersectoral, refugees, human rights, integration, resettlement                                                                                                                                        |
|                                 |                                                                                                                                                                                                         |

SCHOLARONE™  
Manuscripts







### 45 **Strengths and Limitations:**

- 46 • Many programmes exist to attempt to address the unique challenges faced by refugees  
47 but these are largely unevaluated and face challenges to sustainability. This scoping  
48 review will summarize lessons learned from these programmes by exploring barriers and  
49 facilitators to the integration of health services for refugees; the content, process and  
50 actors involved in protecting refugee health; and the extent to which intersectoral  
51 approaches are leveraged to protect refugees' right to health upon resettlement, especially  
52 for vulnerable groups such as women and children.
- 53 • This study will be limited by the quality of the literature on health care programs for  
54 refugees and protection of their right to health.

### 55 **INTRODUCTION**

56 The Office of the United Nations High Commission for Human Rights (OHCHR) identifies the  
57 right to the enjoyment of the highest attainable standard of physical and mental health as a  
58 fundamental part of human rights, first articulated in the 1946 Constitution of the World Health  
59 Organization (WHO).<sup>1</sup> While the right to health includes access to health care and the hard  
60 infrastructure associated with that – such as hospitals and ambulances – it also includes the  
61 underlying determinants of health including, safe drinking water, adequate sanitation, safe food,  
62 adequate nutrition and housing, healthy working and environmental conditions, health related  
63 education and information, and gender equality.<sup>1</sup> Freedoms which protect individuals from non-  
64 consensual medical treatment, torture and other degrading treatment are also included in this  
65 definition. Furthermore, entitlements under the right to health include universal health coverage  
66 – now a target under Sustainable Development Goal 3 – broadly covering access to preventive  
67 and curative services, essential medicines, timely basic health services, health related education,  
68 and participation in health related decision making at both national and community levels.<sup>1,2</sup>  
69 Especially relevant to the plight of refugees, the right to health includes non-discrimination  
70 whereby health services, goods and facilities must be provided to all without any discrimination.  
71 Lastly, these health services must be available in sufficient quantity, accessible, medically and

1  
2  
3  
4 72 culturally acceptable, and of good quality, which includes having a trained health workforce, safe  
5  
6 73 products and adequate sanitation.<sup>2</sup>  
7

8  
9 74 The influx of refugees over the last few years makes the realization of these rights a legal and  
0  
1 75 logistical challenge.<sup>3,4</sup> Different in definition from the term “migrant,” “refugees” are those  
2  
3 76 fleeing armed conflict or persecution as defined by the 1951 Refugee Convention which also  
4  
5 77 identifies their basic rights, specifically that refugees should not be returned to situations that are  
6  
7 78 deemed a threat to their life or freedom.<sup>5</sup> A key distinction is that refugee rights are not only a  
8  
9 79 matter of national legislation, but also of international law.<sup>6</sup> Despite these legal protections,  
0  
1 80 refugees face many challenges in accessing health services, especially more vulnerable groups  
2  
3 81 like women and children.<sup>3,4</sup> Many states explicitly exclude refugees from the level of protection  
4  
5 82 afforded to their citizens, instead choosing to offer “essential care” or “emergency health care,”  
6  
7 83 which is differentially defined across countries.<sup>7</sup> The Committee on the Elimination of Racial  
8  
9 84 Discrimination, and the Committee on Economic, Social and Cultural Rights, both include  
0  
1 85 general comments that hold States accountable to “the right of non-citizens to an adequate  
2  
3 86 standard of physical and mental health by, inter alia, refraining from denying or limiting their  
4  
5 87 access to preventive, curative and palliative health services.”<sup>8</sup>  
6  
7

8  
9 88 However, the capacity of States to truly protect these rights is limited.<sup>9</sup> As the boundaries of the  
0  
1 89 right to health have expanded due to increased understanding of social determinants of health  
2  
3 90 and the health impacts of the lived environment, legal frameworks have been insufficient in  
4  
5 91 ensuring the protection of these rights.<sup>10,11</sup> Refugees are not only more likely to have poorer  
6  
7 92 health during resettlement, but they also face challenges in navigating legal, education, health,  
8  
9 93 housing and employment services, which further threatens their quality of life and health status.<sup>12</sup>  
0  
1 94 A lack of coordination and integration across these services undermines service effectiveness.<sup>13</sup>  
2  
3  
4  
5  
6  
7  
8  
9  
0

1  
2  
3 95 Much like the shift from the more vertical approaches of the millennium development goals  
4  
5 96 (MDGs) towards the more integrated sustainable development goals (SDGs), the protection of  
6  
7  
8 97 the right to health too calls for an intersectoral approach whereby health is applied to all policies  
9  
0  
1 98 for all people.<sup>14</sup> Therefore, for states to effectively protect the right to health for refugees there is  
2  
3 99 a need to work across sectors and disciplines to better integrate targeted programmes and  
4  
5 100 initiatives, thereby improving standards of care during resettlement. Evidence exists that  
6  
7  
8 101 supporting collaboration and coordination across social services improves the quality of care  
9  
0  
1 102 received and its effectiveness.<sup>12</sup> Furthermore, the refugee sub-population is diverse and requires  
2  
2 103 extraneous considerations in ensuring the right to health, not only as compared to the general  
2  
2 104 population, but also within the sub-population itself. Many fragmented psychosocial programmes  
3  
3 105 exist to attempt to address the unique challenges faced by refugees but these are largely  
4  
4 106 unevaluated and lack sustainability.<sup>15,16</sup> Better understanding, documentation, and reporting of  
5  
5 107 the dynamic nature of such interventions and their means of health system integration and  
6  
6 108 intersectoral collaboration, are necessary to ensure that lessons learned are communicated and  
7  
7 109 implemented in the design of future policies and programmes. This would promote continuity of  
8  
8 110 care, people-centred care, and sustainability of health and social services for refugees. Therefore,  
9  
9 111 we aim to conduct a scoping review to explore barriers and facilitators to integrated health  
0  
0 112 services for refugees; the content, process and actors involved in protecting refugee health; and  
1  
1 113 the extent to which intersectoral approaches are leveraged to protect refugees' right to health  
2  
2 114 upon resettlement. This paper will outline the protocol for this review. The specific research  
3  
3 115 questions for the review will be as follows:

- 4  
4 116 (1) What are the barriers and facilitators (context) in integrating targeted services for  
5  
5 117 refugees within existing systems?

1  
2  
3 118 (2) What strategies (content, process, and actors) are involved in addressing refugees' right  
4  
5  
6 119 to health upon resettlement?  
7

8 120 (3) To what extent are intersectoral approaches used to protect refugees' right to health,  
9  
0  
1 121 particularly in women and children?  
2

## 3 122 **METHODS**

### 4 123 **Study Design**

5  
6  
7 124 This study will be conducted using the scoping review methodology as described by the Joanna  
8  
9  
0 125 Briggs Institute Methods Manual for scoping reviews.<sup>17</sup> Scoping reviews are used to map key  
1  
2  
3 126 concepts in an area to identify the scope of practice, working definitions, conceptual boundaries,  
4  
5  
6 127 and the types of evidence available. We opted for a scoping review due to the complex nature of  
7  
8  
9 128 this topic, the changing global landscape around it, and the insufficient evidence base to support  
0  
1  
2 129 effective decision making.<sup>18</sup>

3  
4 130 The five stages outlined in a methodological framework for scoping studies are as follows: i)  
5  
6  
7 131 identify the research question, ii) identify relevant studies, iii) study selection, iv) charting the  
8  
9  
0 132 data, and v) collating, summarising and reporting results.<sup>18</sup>

### 1 133 **Protocol**

2  
3 134 The Preferred Reporting Items for Systematic Reviews and Meta-analysis for Protocols  
4  
5  
6 135 (PRISMA-P) checklist were used in drafting this protocol.<sup>19</sup>  
7

### 8 136 9 137 **Frameworks to address research questions**

0  
1 138 While some evidence suggests that improved collaboration and coordination across social sectors  
2  
3  
4 139 can contribute to enhancing refugee health, there remains a need for a stronger evidence base on  
5  
6  
7 140 the context, processes and actors involved in protecting refugees' right to health upon  
8  
9  
0

1  
2  
3 141 resettlement.<sup>12</sup> Therefore, the research questions identified for this scoping review focus on  
4  
5 142 integration and use of intersectoral approaches to address the complex needs of this vulnerable  
6  
7  
8 143 population. Two frameworks are being used concurrently in order to comprehensively identify  
9  
0  
1 144 barriers, facilitators, processes, and actors involved at various stages in programme planning and  
2  
3 145 implementation. The first is a framework for analyzing integration of targeted health  
4  
5 146 interventions in systems, where integration is defined as “the extent, pattern, and rate of adoption  
6  
7  
8 147 and eventual assimilation of health interventions into each of the critical functions of a health  
9  
0 148 system.”<sup>20</sup> Elements in this framework include (i) governance, (ii) financing, (iii) planning, (iv)  
1 149 service delivery, (v) monitoring and evaluation (M&E), and (vi) demand generation.<sup>20</sup> To be  
2  
3 150 considered integrated, a health system intervention needs to fulfill certain requirements across  
4  
5 151 these six areas as defined by the framework.<sup>20</sup> We define an intervention here as *changes in*  
6  
7 152 *service delivery, organizational models, process modification, or new technologies*. To satisfy  
8  
9 153 governance needs for integration, governance and regulatory mechanisms for the intervention  
0  
1 154 match those of the general health system.<sup>20</sup> For financing, full integration has occurred when  
2  
3 155 funding is incurred from national or regional budgets.<sup>20</sup> In planning – which constitutes needs  
4  
5 156 assessment, priority setting and resource allocation – full integration occurs when the same  
6  
7 157 institutions and stakeholders are involved as those planning general health/ other social  
8  
9 158 systems.<sup>20</sup> If service delivery is the responsibility of general staff embedded in the system, the  
0  
1 159 intervention is considered integrated.<sup>20</sup> Similarly, if monitoring and evaluation was conducted by  
2  
3 160 those with overall M&E responsibility, then the intervention is considered integrated.<sup>20</sup> Finally,  
4  
5 161 demand generation is seen as integrated where services were promoted and incentivized by  
6  
7 162 general staff within the existing system.<sup>20</sup>

1  
2  
3  
4 163 The second framework applied is that of the Health in All Policies (HiAP) framework for  
5  
6 164 country action. HiAP is defined as a way for countries to protect population health through “an  
7  
8 165 approach to public policies across sectors that systematically takes into account the health  
9  
0  
1 166 implications of decisions, seeks synergies, and avoids harmful health impacts in order to improve  
2  
3 167 population health and health equity.”<sup>21</sup> HiAP can be a powerful tool for enhancing accountability  
4  
5 168 and safeguarding against distortions imposed by deleterious commercial and political interests.  
6  
7  
8 169 HiAP is in line with the human rights principles of legitimacy, protected by national and  
9  
0  
1 170 international law, accountability of governments to people, transparency of decision making,  
2  
3 171 participation of the wider society, sustainability of policies to meet current needs without  
4  
5 172 compromising future ones, and collaboration across sectors and levels of government.<sup>11,21</sup> The  
6  
7  
8 173 HiAP framework for action involves six components including: i) establish the need and  
9  
0  
1 174 priorities for HiAP, ii) frame planned action, iii) identify supportive structures and policies, iv)  
2  
3 175 facilitate assessment and engagement, v) ensure monitoring and evaluation, and vi) build  
4  
5 176 capacity.<sup>21</sup> These six components, adapted to refugee needs, will be used in the scoping review to  
6  
7  
8 177 frame barriers and facilitators in integrating refugee services across sectors through intersectoral  
9  
0  
1 178 collaboration. The framework for integration will then be used to assess the extent to which  
2  
3 179 provisions for protecting refugees’ right to health are integrated into existing social systems, and  
4  
5 180 the content, process, and actors involved in integration.<sup>22</sup>

### 181 **Identifying relevant studies**

182 **Population:** Eligible studies and papers will include those targeting refugees and asylum-seekers  
183 as previously defined. We are not including other categories of migrants as their legal  
184 entitlements are different to those of refugees which are protected under international law.  
185 Asylum-seekers have yet to be granted full legal refugee status as their request for sanctuary is



1  
2  
3 186 still in process; however, we are including them in this review in order to capture any programs  
4  
5  
6 187 that are also targeting this vulnerable group and reflect on differences in access to health across  
7  
8 188 the two different stages of being granted sanctuary. This is especially relevant due to the scale of  
9  
0  
1 189 the current refugee crisis and the time it takes to be granted refugee status.

2  
3 190 **Intervention:** Eligible studies and papers will describe a programme, approach or technical  
4  
5 191 innovation that aims to protect refugees' right to health, including interventions aimed at  
6  
7  
8 192 addressing the social determinants of health. Interventions outside of the health sector that affect  
9  
0  
1 193 health will be included. If the studies do not display some level of integration or intersectorality,  
2  
3 194 based on the frameworks for integration and HiAP, they will not be assessed further.<sup>20,21</sup> This  
4  
5 195 will be determined using a data abstraction chart where the key elements of the two frameworks  
6  
7 196 will be laid out and contrasted against the studies found.

8  
9 197 **Comparators:** Eligible studies and papers do not necessarily have to display a comparator as this  
0  
1 198 scoping review is meant to gauge the state of the evidence. Where comparators exist, any types  
2  
3 199 are relevant for inclusion, for example those comparing a parallel approach to service provision  
4  
5 200 for refugees versus an integrated approach.

6  
7 201 **Outcomes:** Eligible studies and papers will include those discussing plans for action, strategies,  
8  
9 202 barriers, facilitators or outcomes in integrating refugee health using an integrated or intersectoral  
0  
1 203 approach. Studies or commentaries that solely discuss theories and conceptual models will be  
2  
3 204 excluded.

4  
5 205 **Study design:** Qualitative, quantitative, and mixed methods will be eligible for inclusion.  
6  
7 206 Experimental designing including randomized controlled trials, non-randomized controlled trials  
8  
9 207 and quasi-experimental models will be included, as well as observation and qualitative studies  
0  
1 208 including cohort, cross sectional, case series, ethnographic, interview/based, and focus-group

1  
2  
3 209 discussion based studies. Grey literature that explores plans, strategies, barriers, facilitators or  
4  
5  
6 210 outcomes of refugee health, as well as implementation research and operations research studies  
7  
8 211 will also be included. Studies or report outlining stakeholder experiences and plans will also be  
9  
0  
1 212 included as case studies.

2  
3 213 **Time period:** In order to ensure relevance, only studies from 2000 onward (search completed  
4  
5 214 May 8<sup>th</sup> 2017) have been included, making the study period range over 16 years. It is estimated  
6  
7 215 that the review will be completed by January 2018.

8  
9 216 **Setting:** Eligible studies will be set in countries receiving refugees and asylum seekers (who may  
0  
1 217 eventually qualify for refugee status) and serving as hosts for resettlement.

## 2 218 **Information sources and search strategy**

3 219 Based on the study team's concepts for the review, an experienced team of librarians from  
4  
5 220 Karolinska Institutet have conducted a search of articles from 2000 to May 2017 in the following  
6  
7 221 electronic databases: MEDLINE, Web of Science, Global Health, and PsycInfo Embase. The  
8  
9 222 three concepts used to create the search strategy included: i) refugees and asylum-seekers; ii)  
0  
1 223 type of service provision (health sector service delivery, intersectoral approaches, partnerships,  
2  
3 224 integration); and iii) health equity, human rights and social determinants of health. See appendix  
4  
5 225 I for search strategy.

6 226 The search of the peer-reviewed literature will be supplemented by a search of grey literature  
7  
8 227 through government websites, particularly governments of countries that receive the highest  
9  
0 228 refugee burden, reports from multi-nationals and non-governmental organizations, conference  
1  
2 229 abstracts, dissertations, and news articles. Any additional report and articles will be identified by  
3  
4 230 reaching out to relevant stakeholders in the authors' professional networks, including those  
5  
6 231 involved in the European refugee response.

### 232 **Study selection process**

233 Search results will be cleaned for duplicates and uploaded to an excel document, which will be  
234 used for screening using the eligibility criteria described above.

235 Two members of the study team will screen results based on the screening tool discussed. Inter-  
236 rater reliability will be assessed based on a set of 100 initial screens, and adjustments and  
237 clarifications to the screening tool will be made if reliability is not as high as desired (above  
238 80%). Once a set of included studies and papers are identified, two reviewers will independently  
239 conduct a full-text screen in order to apply the aforementioned frameworks for integration and  
240 intersectorality (HiAP). Eligible studies will be those displaying integration or intersectorality,  
241 defined as satisfying at least 2 of the 6 elements in either one of the integration or HiAP  
242 frameworks. A third reviewer has been identified in the event of disagreement between the two  
243 reviewers. This will be followed by data abstraction, using a form derived from the two  
244 framework, from the finalized set.

### 245 **Data abstraction and charting process**

246 General data collected will include study design, setting, and journal discipline. Demographic  
247 data collected will include context, target study group (gender, age, ethnic background, status),  
248 number of participants, economy status of setting based on World Bank classifications, and level  
249 of the health system where applicable (community, district, regional, etc.). Intervention-specific  
250 data collected will include the type of intervention (behavioural, medical, social), the social  
251 determinant of health being addressed (WHO commission on social determinants of health  
252 framework)<sup>23</sup>, the primary sector(s) involved (health, education, law enforcement, housing, etc.),  
253 duration, resources, funding source, and conceptual framework applied if any. Outcome data  
254 collected will include barriers, facilitators, strategies, plans, qualitative findings from interviews

1  
2  
3 255 and focus groups, and any unintended consequences. Programmes and approaches specific to  
4  
5  
6 256 refugees versus asylum seekers will be disaggregated and distinctions highlighted. In the final set  
7  
8  
9 257 of included studies – those displaying some level of integration or intersectorality – key elements  
0  
1 258 will be charted according to the two frameworks described above.<sup>18,20,21</sup> Data will be charted to  
2  
3 259 include types of stakeholders involved in (i) governance, (ii) financing, (iii) planning, (iv) service  
4  
5 260 delivery, (v) monitoring and evaluation (M&E), and (vi) demand generation.<sup>20</sup> This will assess  
6  
7  
8 261 the extent of integration while data charted against the six components of the HiAP framework  
9  
0 262 will assess the intersectoral potential of the intervention. Two members of the study team will  
1  
2 263 code studies on NVivo software<sup>24</sup> using a coding guide based on the two frameworks used for  
3  
4 264 the review.

5  
6  
7 265 The data abstraction form will be tested by both reviewers using 5 studies. Where there is a  
8  
9 266 sufficient level of agreement across reviewers (above 80%), data abstraction will continue as  
0  
1 267 designed. If agreement falls below the required range, the data abstraction form will be clarified.  
2  
3 268 As this is a scoping review, meta-analysis will not be conducted.

### 269 **Risk of bias assessment**

4  
5 270 In line with the manual used to design this scoping review, risk of bias assessments will not be  
6  
7 271 conducted.<sup>17</sup>

### 272 **Results**

4  
5 273 Frequency tables will be used to describe included studies quantitatively while narratives will be  
6  
7 274 used to describe interventions, barriers, facilitators, and other qualitative outcomes. Stakeholders  
8  
9 275 will be presented based on the combined integration and HiAP frameworks, with their roles and  
0  
1 276 involvement in the studies outlined. If a sufficiently diverse range of studies are identified,

1  
2  
3 277 stratification by health system level (community, district, region) and country economy status  
4  
5 278 will be done.  
6  
7

8 279 Charted data will be mapped out into subcategories to allow for a narrative description of  
9  
0 280 barriers and facilitators, including barriers specific to vulnerable groups (women, children,  
1  
2 281 torture survivors, those with disabilities, etc.). New themes will be added where necessary and  
3  
4 282 elements of integration and/or intersectorality that are more or less prevalent across included  
5  
6 283 studies will be highlighted. Finally, context, content, process and actors will be mapped based  
7  
8 284 on charted data in accordance with the Walt Policy Triangle.<sup>22</sup> Vulnerabilities of specific groups  
9  
0 285 such as women and children will be highlighted.  
1  
2  
3

## 286 **DISCUSSION**

### 287 **Implications**

288 This scoping review will identify programmes, approaches and interventions both within and  
289 outside the health sector that promote and protect refugees' right to health directly or indirectly  
290 through social determinants of health. To support country-level decision making and resettlement  
291 efforts, this review will provide an understanding of the extent of integration and intersectoral  
292 collaboration currently reported in this area, barriers and facilitators to provision of such services  
293 and their integration, and key stakeholders involved as well as those often missing. Findings will  
294 be shared with WHO colleagues working in this area, the Alliance for Health Policy and Systems  
295 Research contacts, and a network of policy makers who will in turn share with their national and  
296 local networks. Other expected outputs include an improved understanding of contextual factors  
297 that are necessary in supporting the right to health for refugees as well as a narrative exploration  
298 of whether intersectoral collaboration and the idea of "Health in All Policies" (HiAP) also works  
299 to protect and promote the health of persons outside of the traditional definitions of citizenry.

1  
2  
3 300 These discussions will stimulate dialogue on how receiving countries can strengthen the  
4  
5  
6 301 resilience of their social systems to enhance their capacity for effective resettlement and  
7  
8 302 improved health outcomes in their refugee populations.  
9

### 0 303 **Ethics and Dissemination**

1 304 In addition to the study team's respective networks, this review will also be disseminated at  
2  
3 305 relevant conferences, meetings, and communities of practice focused on enhancing use of  
4  
5 306 evidence in policy making. A brief of key learnings will be created to support evidence-informed  
6  
7 307 decision making in this area.  
8

9 308 Ethics approval is not required for this scoping review as human subjects are not involved.  
0

### 1 309 **AUTHOR'S CONTRIBUTIONS**

2 310 DJ drafted the paper and will be acting as primary reviewer, EVL, SH, PF, and GT provided  
3  
4 311 feedback and comments. SH and EVL will be acting as secondary reviewers. PF and GT, of  
5  
6 312 SIGHT will be providing continued support and connecting to relevant actors working in this area.  
7

8 313

### 9 314 **ACKNOWLEDGMENTS**

0 315 The authors would like to thank Karolinska Institutet librarians, Magdalena Svanberg and Gun  
1  
2 316 Brit Knutssön, for their contributions, specifically in running the search and identifying  
3  
4 317 appropriate databases. We are also grateful to WHO Euro, specifically Dr Santino Severoni and  
5  
6 318 Sara Barragan Montes, for their discussions and suggestions in the early stages of this project.  
7

8 319

### 9 320 **COMPETING INTERESTS AND FUNDING STATEMENT**

0 321 The authors have no competing interests to declare. No funding was obtained for this project. In-  
1  
2 322 kind time contributions from staff at the Alliance for Health Policy and Systems Research and  
3  
4  
5  
6  
7  
8  
9  
0

323 Swedish Institute for Global Health Transformation, SIGHT, through support from the Bill and  
324 Melinda Gates Foundation, have made this possible.

## 325 REFERENCES

- 326 1. OHCHR. The Right to Health Geneva, Switzerland: Office of the United Nations High  
327 Commissioner for Human Rights & WHO, 2008.
- 328 2. Tangcharoensathien V, Mills A, Palu T. Accelerating health equity: the key role of universal  
329 health coverage in the Sustainable Development Goals. *BMC Medicine* 2015; **13**(1): 101.
- 330 3. Rechel B, Mladovsky P, Ingleby D, Mackenbach JP, McKee M. Migration and health in an  
331 increasingly diverse Europe. *Lancet* 2013; **381**(9873): 1235-45.
- 332 4. Langlois EV, Haines A, Tomson G, Ghaffar A. Refugees: towards better access to health-care  
333 services. *Lancet* 2016; **387**(10016): 319-21.
- 334 5. UNHCR. Convention and Protocol relating to the status of refugees. Geneva, Switzerland United  
335 Nations High Commissioner for Refugees, 2010.
- 336 6. UNHCR. UNHCR viewpoint: 'Refugee' or 'migrant' – Which is right? UNHCR. Geneva,  
337 Switzerland; 2016.
- 338 7. EU Cot. Council Directive 2003/9/EC of 27 January 2003 laying down minimum standards for the  
339 reception of asylum seekers. *Official Journal of the European Union* 2003; **L31/18**.
- 340 8. discrimination Coteor. General Recommendation 30: Discrimination against non-citizens.  
341 Committee on the elimination of racial discrimination; 2004; 2004.
- 342 9. Norredam M, Mygind A, Krasnik A. Access to health care for asylum seekers in the European  
343 Union--a comparative study of country policies. *Eur J Public Health* 2006; **16**(3): 286-90.
- 344 10. Jackson Bowers IC. Meeting the primary health care needs of refugees and asylum seekers.  
345 *PHCRIS Research Roundup* 2010; (16).
- 346 11. WHO. Advancing the right to health: the vital role of law. Geneva, Switzerland: World Health  
347 Organization, O'Neil Institute, International Development Law Organization, University of Sydney, 2017.
- 348 12. Joshi C, Russell G, Cheng IH, et al. A narrative synthesis of the impact of primary health care  
349 delivery models for refugees in resettlement countries on access, quality and coordination. *Int J Equity*  
350 *Health* 2013; **12**: 88.
- 351 13. Protection DolaB. Fact sheet 60 - Australia's refugee and humanitarian program. Canberra:  
352 Australian Government: Department of Immigration and Border Protection, 2010.
- 353 14. UN. Integrated Approaches to Sustainable Development Planning and Implementation. New  
354 York, USA: United Nations, 2015.
- 355 15. Kett ME. Internally Displaced Peoples in Bosnia-Herzegovina: Impacts of Long-term  
356 Displacement on Health and Well-being. *Medicine, Conflict and Survival* 2005; **21**(3): 199-215.
- 357 16. Patel N, Kellezi B, Williams AC. Psychological, social and welfare interventions for psychological  
358 health and well-being of torture survivors. *Cochrane Database Syst Rev* 2014; (11): CD009317.
- 359 17. Micah Peters CG, Patricia McInerney, Cassia Soares, Hanan Khalil, Deborah Parker. The Joanna  
360 Briggs Institute Reviewers' Manual: Methodology for JBI Scoping Review. South Australia: Joanna Briggs  
361 Institute, 2015.
- 362 18. Arksey H, O'Malley L. Scoping studies: towards a methodological framework. *International*  
363 *Journal of Social Research Methodology* 2005; **8**(1): 19-32.
- 364 19. Moher D, Shamseer L, Clarke M, et al. Preferred reporting items for systematic review and meta-  
365 analysis protocols (PRISMA-P) 2015 statement. *Systematic Reviews* 2015; **4**(1): 1.

- 1  
2  
3 366 20. Atun R, de Jongh T, Secci F, Ohiri K, Adeyi O. Integration of targeted health interventions into  
4 367 health systems: a conceptual framework for analysis. *Health Policy and Planning* 2010; **25**(2): 104-11.  
5 368 21. WHO. Health in All Policies: Framework for Country Action France: World Health Organization,  
6 369 Finland Ministry of Social Affairs and Health, 2014.  
7 370 22. Walt G, Shiffman J, Schneider H, Murray SF, Brugha R, Gilson L. 'Doing' health policy analysis:  
8 371 methodological and conceptual reflections and challenges. *Health Policy and Planning* 2008; **23**(5): 308-  
9 372 17.  
10 373 23. WHO. A Conceptual Framework for Action on the Social Determinants of Health. Geneva: WHO,  
11 374 2010.  
12 375 24. NVivo. NVivo 10. . Australia: International QSR; 2012.

13 376

14 377

15 378

For peer review only



## Appendix I

## 1. Medline(Ovid)

Date of Search: 5 May 2017

Number of hits: 2,766

Comments:

Field labels:

.tw,kf. = title, abstract, keyword

exp/ = MeSH, exploded

/ = MeSH, not exploded

adj3 = within two words

1. Refugees/
2. exp "Emigrants and Immigrants"/
3. "Emigration and Immigration"/
4. "Transients and Migrants"/
5. (refugee\* or immigra\* or migrat\* or migrant\* or asylum\* or transient\*).tw,kf.
6. or/1-5
  
7. Delivery of Health Care/
8. Health Services Accessibility/
9. Patient Acceptance of Health Care/
10. "Health Services Needs and Demand"/
11. Quality of Health Care/
12. Interinstitutional Relations/
13. Interdepartmental Relations/
14. Public-Private Sector Partnerships/
15. ((health care or healthcare or health service\*) adj3 (access\* or availab\* or barrier\* or deliver\* or need\* or provision\* or seeking or quality or utilization)).tw,kf.
16. ((multisector\* or multi-sector\* or intersector\* or inter-sector\* or crosssector\* or cross-sector\* or interdisciplinary or inter-disciplinary or multidisciplinary or multi-disciplinary or interinstitution\* or inter-institution\* or interdepartment\* or inter-department\*) adj3 (analysis or collaborat\* or cooperat\* or co-operat\* or approach\* or partnership\* or relation\*)).tw,kf.
17. or/7-16
  
18. Healthcare Disparities/
19. Social Determinants of Health/
20. Health Status Disparities/
21. Health Equity/
22. exp Human Rights/
23. Community Integration/
24. Acculturation/
25. ((health or health care or healthcare or health service\*) adj3 (situation or difference\*)).tw,kf.
26. (disparit\* or equity or equities or inequity or inequities or equalit\* or inequalit\* or right\* or injustice\* or discrimination\* or determinant\* or disadvantage\* or vulnerab\*).tw,kf.
27. (acculturat\* or assimilat\* or integration).tw,kf.
  
28. or/18-27



## 2. Web of Science (Thomson Reuter)

Date of Search: 8 May 2017

Number of hits: 1,727

Comments:

Field labels:

TOPIC = title, abstract, keywords

NEAR/3 = within 3 words

#1 TOPIC: (refugee\* or immigra\* or migrat\* or migrant\* or asylum\* or transient\*)

#2 TOPIC: (("health care" or healthcare or "health service\*") NEAR/3 (access\* or availab\* or barrier\* or deliver\* or need\* or provision\* or seeking or quality or utilization))

#3 TOPIC: ((multisector\* or multi-sector\* or intersector\* or inter-sector\* or crosssector\* or cross-sector\* or interdisciplinary or inter-disciplinary or multidisciplinary or multi-disciplinary or interinstitution\* or inter-institution\* or interdepartment\* or inter-department\*) NEAR/3 (analysis or collaborat\* or cooperat\* or co-operat\* or approach\* or partnership\* or relation\*))

#4 #3 OR #2

#5 TOPIC: ((health or "health care" or healthcare or "health service\*") NEAR/3 (situation or difference\*))

#6 TOPIC: (disparit\* or equity or equities or inequity or inequities or equalit\* or inequalit\* or "human right\*" or "civil right\*" or "citizen\* right\*" or "social right\*" or injustice\* or discrimination\* or determinant\* or disadvantage\* or vulnerab\* or acculturat\* or assmilat\* or integration)

#7 #6 OR #5

#8 #7 AND #4 AND #1

#9 Timespan: 2000-2017.

## 3. Global Health (Ovid)

Date of Search: 8 May 2017

Number of hits: 667

Comments:

Field labels:

.ab,ti. = title, abstract

exp/ =thesaurus term, exploded

/ = thesaurus term, not exploded

adj3 = within two words

1. refugees/
2. immigrants/
3. migrants/
4. immigration/
5. (refugee\* or immigra\* or migrat\* or migrant\* or asylum\* or transient\*).ab,ti.
6. or/1-5
  
7. health care utilization/
8. ((health care or healthcare or health service\*) adj3 (access\* or availab\* or barrier\* or deliver\* or need\* or provision\* or seeking or quality or utilization)).ab,ti.
9. ((multisector\* or multi-sector\* or intersector\* or inter-sector\* or crosssector\* or cross-sector\* or interdisciplinary or inter-disciplinary or multidisciplinary or multi-disciplinary or interinstitution\* or inter-institution\* or interdepartment\* or inter-department\*) adj3 (analysis or collaborat\* or cooperat\* or co-operat\* or approach\* or partnership\* or relation\*)).ab,ti.
10. or/7-9
  
11. exp disparity/
12. exp discrimination/
13. human rights/
14. cultural integration/
15. social integration/
16. acculturation/
17. ((health or health care or healthcare or health service\*) adj3 (situation or difference\*)).ti,ab.
18. (disparit\* or equity or equities or inequity or inequities or equalit\* or inequalit\* or right\* or injustice\* or discrimination\* or determinant\* or disadvantage\* or vulnerab\*).ti,ab.
19. (acculturat\* or assimilat\* or integration).ti,ab.
20. or/11-19
  
21. 6 and 10 and 20
  
22. limit 21 to yr="2000-Current"

## 4. PsycInfo (OVID)

Date of Search: 8 May 2017

Number of hits: 902

Comments:

Field labels:

.ti,ab,id. = title, abstract, keyword

exp/ = subject heading, exploded

/ = subject heading, not exploded

adj3 = within two words

1. exp Human Migration/

2. Immigration/

3. (refugee\* or immigra\* or migrat\* or migrant\* or asylum\* or transient\*).ti,ab,id.

4. or/1-3

5. Health Care Delivery/

6. Health Care Utilization/

7. Health Care Seeking Behavior/

8. Health Service Needs/

9. "Quality of Care"/

10. ((health care or healthcare or health service\*) adj3 (access\* or availab\* or barrier\* or deliver\* or need\* or provision\* or seeking or quality or utilization)).ti,ab,id.

11. ((multisector\* or multi-sector\* or intersector\* or inter-sector\* or crosssector\* or cross-sector\* or interdisciplinary or inter-disciplinary or multidisciplinary or multi-disciplinary or interinstitution\* or inter-institution\* or interdepartment\* or inter-department\*) adj3 (analysis or collaborat\* or cooperat\* or co-operat\* or approach\* or partnership\* or relation\*)).ti,ab,id.

12. or/5-11

13. Health Disparities/

14. Social Equality/

15. exp Human Rights/

16. exp Social integration/

17. Assimilation/

18. ((health or health care or healthcare or health service\*) adj3 (situation or difference\*)).ti,ab,id.

19. (disparit\* or equity or equities or inequity or inequities or equalit\* or inequalit\* or human right\* or civil right\* or citizen\* right\* or social right\* or injustice\* or discrimination\* or determinant\* or disadvantage\* or vulnerab\*).ti,ab,id.

20. (acculturat\* or assimilat\* or integration).ti,ab,id.

21. or/13-20

22. 4 and 12 and 21

23. limit 22 to yr="2000 -Current"

**PRISMA-P (Preferred Reporting Items for Systematic review and Meta-Analysis Protocols) 2015 checklist: recommended items to address in a systematic review protocol\***

| Section and topic                 | Item No | Checklist item                                                                                                                                                                                                                | Page                                                                                              |
|-----------------------------------|---------|-------------------------------------------------------------------------------------------------------------------------------------------------------------------------------------------------------------------------------|---------------------------------------------------------------------------------------------------|
| <b>ADMINISTRATIVE INFORMATION</b> |         |                                                                                                                                                                                                                               |                                                                                                   |
| Title:                            |         |                                                                                                                                                                                                                               |                                                                                                   |
| Identification                    | 1a      | Identify the report as a protocol of a systematic review                                                                                                                                                                      | 1, 2                                                                                              |
| Update                            | 1b      | If the protocol is for an update of a previous systematic review, identify as such                                                                                                                                            | NA                                                                                                |
| Registration                      | 2       | If registered, provide the name of the registry (such as PROSPERO) and registration number                                                                                                                                    | Registered on Open Science Framework at <a href="https://osf.io/gt9ck/">https://osf.io/gt9ck/</a> |
| Authors:                          |         |                                                                                                                                                                                                                               |                                                                                                   |
| Contact                           | 3a      | Provide name, institutional affiliation, e-mail address of all protocol authors; provide physical mailing address of corresponding author                                                                                     | 1                                                                                                 |
| Contributions                     | 3b      | Describe contributions of protocol authors and identify the guarantor of the review                                                                                                                                           | 13                                                                                                |
| Amendments                        | 4       | If the protocol represents an amendment of a previously completed or published protocol, identify as such and list changes; otherwise, state plan for documenting important protocol amendments                               | NA                                                                                                |
| Support:                          |         |                                                                                                                                                                                                                               |                                                                                                   |
| Sources                           | 5a      | Indicate sources of financial or other support for the review                                                                                                                                                                 | NA                                                                                                |
| Sponsor                           | 5b      | Provide name for the review funder and/or sponsor                                                                                                                                                                             | NA                                                                                                |
| Role of sponsor or funder         | 5c      | Describe roles of funder(s), sponsor(s), and/or institution(s), if any, in developing the protocol                                                                                                                            | 14                                                                                                |
| <b>INTRODUCTION</b>               |         |                                                                                                                                                                                                                               |                                                                                                   |
| Rationale                         | 6       | Describe the rationale for the review in the context of what is already known                                                                                                                                                 | 4-5                                                                                               |
| Objectives                        | 7       | Provide an explicit statement of the question(s) the review will address with reference to participants, interventions, comparators, and outcomes (PICO)                                                                      | 5-6                                                                                               |
| <b>METHODS</b>                    |         |                                                                                                                                                                                                                               |                                                                                                   |
| Eligibility criteria              | 8       | Specify the study characteristics (such as PICO, study design, setting, time frame) and report characteristics (such as years considered, language, publication status) to be used as criteria for eligibility for the review | 8-10                                                                                              |
| Information sources               | 9       | Describe all intended information sources (such as electronic databases, contact with study authors, trial registers or other grey literature sources) with planned dates of coverage                                         | 9                                                                                                 |

1  
2  
3  
4  
5  
6  
7  
8  
9  
0  
1  
2  
3  
4  
5  
6  
7  
8  
9  
0  
1  
2  
3  
4  
5  
6  
7  
8  
9  
0  
1  
2  
3  
4  
5  
6  
7  
8  
9  
0  
1  
2  
3  
4  
5  
6  
7  
8  
9  
0

|                                    |     |                                                                                                                                                                                                                                                  |             |
|------------------------------------|-----|--------------------------------------------------------------------------------------------------------------------------------------------------------------------------------------------------------------------------------------------------|-------------|
| Search strategy                    | 10  | Present draft of search strategy to be used for at least one electronic database, including planned limits, such that it could be repeated                                                                                                       | 9-10; 16-20 |
| Study records:                     |     |                                                                                                                                                                                                                                                  |             |
| Data management                    | 11a | Describe the mechanism(s) that will be used to manage records and data throughout the review                                                                                                                                                     | 10-11       |
| Selection process                  | 11b | State the process that will be used for selecting studies (such as two independent reviewers) through each phase of the review (that is, screening, eligibility and inclusion in meta-analysis)                                                  | 10          |
| Data collection process            | 11c | Describe planned method of extracting data from reports (such as piloting forms, done independently, in duplicate), any processes for obtaining and confirming data from investigators                                                           | 11          |
| Data items                         | 12  | List and define all variables for which data will be sought (such as PICO items, funding sources), any pre-planned data assumptions and simplifications                                                                                          | 11          |
| Outcomes and prioritization        | 13  | List and define all outcomes for which data will be sought, including prioritization of main and additional outcomes, with rationale                                                                                                             | 11-12       |
| Risk of bias in individual studies | 14  | Describe anticipated methods for assessing risk of bias of individual studies, including whether this will be done at the outcome or study level, or both; state how this information will be used in data synthesis                             | NA          |
| Data synthesis                     | 15a | Describe criteria under which study data will be quantitatively synthesised                                                                                                                                                                      | 12          |
|                                    | 15b | If data are appropriate for quantitative synthesis, describe planned summary measures, methods of handling data and methods of combining data from studies, including any planned exploration of consistency (such as $I^2$ , Kendall's $\tau$ ) | 12          |
|                                    | 15c | Describe any proposed additional analyses (such as sensitivity or subgroup analyses, meta-regression)                                                                                                                                            | 12          |
|                                    | 15d | If quantitative synthesis is not appropriate, describe the type of summary planned                                                                                                                                                               | 12          |
| Meta-bias(es)                      | 16  | Specify any planned assessment of meta-bias(es) (such as publication bias across studies, selective reporting within studies)                                                                                                                    | 12          |
| Confidence in cumulative evidence  | 17  | Describe how the strength of the body of evidence will be assessed (such as GRADE)                                                                                                                                                               | NA          |

**\* It is strongly recommended that this checklist be read in conjunction with the PRISMA-P Explanation and Elaboration (cite when available) for important clarification on the items. Amendments to a review protocol should be tracked and dated. The copyright for PRISMA-P (including checklist) is held by the PRISMA-P Group and is distributed under a Creative Commons Attribution Licence 4.0.**

*From: Shamseer L, Moher D, Clarke M, Ghersi D, Liberati A, Petticrew M, Shekelle P, Stewart L, PRISMA-P Group. Preferred reporting items for systematic review and meta-analysis protocols (PRISMA-P) 2015: elaboration and explanation. BMJ. 2015 Jan 2;349(jan02 1):g7647.*
